# Supplementary material for: Red List assessment of amphibian species of Ecuador: A multidimensional approach for their conservation
Source: PubMed Central journal article supplement (PMC8101765; doi:10.1371/journal.pone.0251027), 2021-05-06
Supplement: pone.0251027.s015.pdf [file pone.0251027.s015.pdf]

Red List assessment for amphibian species of Ecuador: a multidimensional approach for their conservation  
 --Manuscript Draft--

|                              |                                                                                                                                                                                                                                                                                                                                                                                                                                                                                                                                                                                                                                                                                                                                                                                                                                                                                                                                                                                                                                                                                                                                                                                                                                                                                                                                                                                                                                                                                                                                                                                                                                                                                                                                                                                                                                                                                                                                                                                                                                                                                                                                                                                                                        |
|------------------------------|------------------------------------------------------------------------------------------------------------------------------------------------------------------------------------------------------------------------------------------------------------------------------------------------------------------------------------------------------------------------------------------------------------------------------------------------------------------------------------------------------------------------------------------------------------------------------------------------------------------------------------------------------------------------------------------------------------------------------------------------------------------------------------------------------------------------------------------------------------------------------------------------------------------------------------------------------------------------------------------------------------------------------------------------------------------------------------------------------------------------------------------------------------------------------------------------------------------------------------------------------------------------------------------------------------------------------------------------------------------------------------------------------------------------------------------------------------------------------------------------------------------------------------------------------------------------------------------------------------------------------------------------------------------------------------------------------------------------------------------------------------------------------------------------------------------------------------------------------------------------------------------------------------------------------------------------------------------------------------------------------------------------------------------------------------------------------------------------------------------------------------------------------------------------------------------------------------------------|
| <b>Manuscript Number:</b>    | PONE-D-20-34320                                                                                                                                                                                                                                                                                                                                                                                                                                                                                                                                                                                                                                                                                                                                                                                                                                                                                                                                                                                                                                                                                                                                                                                                                                                                                                                                                                                                                                                                                                                                                                                                                                                                                                                                                                                                                                                                                                                                                                                                                                                                                                                                                                                                        |
| <b>Article Type:</b>         | Research Article                                                                                                                                                                                                                                                                                                                                                                                                                                                                                                                                                                                                                                                                                                                                                                                                                                                                                                                                                                                                                                                                                                                                                                                                                                                                                                                                                                                                                                                                                                                                                                                                                                                                                                                                                                                                                                                                                                                                                                                                                                                                                                                                                                                                       |
| <b>Full Title:</b>           | Red List assessment for amphibian species of Ecuador: a multidimensional approach for their conservation                                                                                                                                                                                                                                                                                                                                                                                                                                                                                                                                                                                                                                                                                                                                                                                                                                                                                                                                                                                                                                                                                                                                                                                                                                                                                                                                                                                                                                                                                                                                                                                                                                                                                                                                                                                                                                                                                                                                                                                                                                                                                                               |
| <b>Short Title:</b>          | Red List assessment for Ecuadorian amphibians                                                                                                                                                                                                                                                                                                                                                                                                                                                                                                                                                                                                                                                                                                                                                                                                                                                                                                                                                                                                                                                                                                                                                                                                                                                                                                                                                                                                                                                                                                                                                                                                                                                                                                                                                                                                                                                                                                                                                                                                                                                                                                                                                                          |
| <b>Corresponding Author:</b> | H. Mauricio Ortega-Andrade<br>Universidad Regional Amazónica IKIAM: Universidad Regional Amazonica IKIAM Tena, Amazonia ECUADOR                                                                                                                                                                                                                                                                                                                                                                                                                                                                                                                                                                                                                                                                                                                                                                                                                                                                                                                                                                                                                                                                                                                                                                                                                                                                                                                                                                                                                                                                                                                                                                                                                                                                                                                                                                                                                                                                                                                                                                                                                                                                                        |
| <b>Keywords:</b>             | Conservation; ecological niche modeling; threat modeling; risk categories                                                                                                                                                                                                                                                                                                                                                                                                                                                                                                                                                                                                                                                                                                                                                                                                                                                                                                                                                                                                                                                                                                                                                                                                                                                                                                                                                                                                                                                                                                                                                                                                                                                                                                                                                                                                                                                                                                                                                                                                                                                                                                                                              |
| <b>Abstract:</b>             | <p>Ecuador is one of the most biodiverse countries in the world, but faces severe pressures and threats to its natural ecosystems. Numerous species have declined and require to be objectively evaluated and quantified, as a step towards the development of conservation strategies. Herein, we present an updated Red List Assessment for amphibian species of Ecuador, with one of the most detailed and complete coverages for any Ecuadorian taxonomic group to date. Based on standardized methodologies that integrate taxonomic work, spatial analyses, and ecological niche modeling, we assessed the extinction risk and identified the main threats for all Ecuadorian native amphibians (635 species), using the IUCN Red List Categories and Criteria. Our evaluation reveals that 57% (363 species) are categorized as Threatened, 12% (78 species) as Near Threatened, 4% (26 species) as Data Deficient, and 27% (168 species) as Least Concern. Our assessment almost doubles the number of threatened species in comparison with previous evaluations. In addition to habitat loss, the expansion of the agricultural frontier and other anthropogenic threats (roads, human settlements, and mining/oil activities) amplify the incidence of other pressures as relevant predictors of ecological integrity. Potential synergic effects with climate change and emergent diseases (apparently responsible for the sudden declines), has a particular importance amongst the threats sustained by Ecuadorian amphibians.</p> <p><b>Additional.</b> Most threatened species are distributed in montane forests and paramo habitats of the Andes, with nearly 10% of them occurring outside the National System of Protected Areas of the Ecuadorian government. Also, it is essential to place research efforts on little known species categorized as Data Deficient (DD), which may turn out to be endangered. Such integration will help in better management and conservation of amphibian species in countries of the Tropical Andes Biodiversity Hotspot, like Ecuador. This assessment was a key step to develop the National Action Plan for the Conservation of Ecuadorian amphibians.</p> |
| <b>Order of Authors:</b>     | H. Mauricio Ortega-Andrade<br>Marina Rodes Blanco<br>Diego Francisco Cisneros Heredia<br>Nereida Guerra Arévalo<br>Karima Gabriela López de Vargas-Machuca<br>Juan C. Sánchez-Nivicela<br>Diego Armijos-Ojeda<br>Jose Francisco Cáceres Andrade<br>Carolina Reyes Puig<br>Amanda Belén Quezada Riera<br>Paul Székely                                                                                                                                                                                                                                                                                                                                                                                                                                                                                                                                                                                                                                                                                                                                                                                                                                                                                                                                                                                                                                                                                                                                                                                                                                                                                                                                                                                                                                                                                                                                                                                                                                                                                                                                                                                                                                                                                                   |

|                                   |
|-----------------------------------|
| Octavio R. Rojas Soto             |
| Diana Székely                     |
| Juan M. Guayasamin                |
| Fausto Rodrigo Siavichay Pesántez |
| Luis Amador                       |
| Raquel Betancourt                 |
| Salomón M. Ramírez Jaramillo      |
| Bruno Timbe Borja                 |
| Miguel Gómez Laporta              |
| Juan Fernando Webster Bernal      |
| Luis Alfredo Oyagata Cachimuel    |
| Daniel Chávez Jácome              |
| Valentina Posse                   |
| Carlos Valle Piñuela              |
| Daniel Padilla Jiménez            |
| Juan Pablo Reyes Puig             |
| Andrea Terán Valdez               |
| Luis A. Coloma                    |
| María Beatriz Pérez Lara          |
| Sofía Carvajal Endara             |
| Miguel Urgilés                    |
| Mario H. Yáñez Muñoz              |

**Additional Information:**

| Question                                                                                                                                                                                                                                                                                                                                                                                                                                                                                            | Response                                                                                                                                                                                                                                                                                                                                                                                                                                                                                                                                                                                                                                                                       |
|-----------------------------------------------------------------------------------------------------------------------------------------------------------------------------------------------------------------------------------------------------------------------------------------------------------------------------------------------------------------------------------------------------------------------------------------------------------------------------------------------------|--------------------------------------------------------------------------------------------------------------------------------------------------------------------------------------------------------------------------------------------------------------------------------------------------------------------------------------------------------------------------------------------------------------------------------------------------------------------------------------------------------------------------------------------------------------------------------------------------------------------------------------------------------------------------------|
| <p><b>Financial Disclosure</b></p> <p>Enter a financial disclosure statement that describes the sources of funding for the work included in this submission. Review the <a href="#">submission guidelines</a> for detailed requirements. View published research articles from <a href="#">PLOS ONE</a> for specific examples.</p> <p>This statement is required for submission and <b>will appear in the published article</b> if the submission is accepted. Please make sure it is accurate.</p> | <p>This work was supported by the project “Conservation of Ecuadorian Amphibians and access to genetic resources-PARG”; projects “On the quest of the golden fleece in Amazonia: The first herpetological DNA - barcoding expedition to unexplored areas on the Napo watershed, Ecuador”, funded by the Secretaría Nacional de Ciencia y Tecnología del Ecuador (Senescyt-ENSAMBLE Grant #PIC-17-BENS-001) and The World Academy of Sciences (TWAS Grant #16-095) granted to HMOA; and the project Critical Ecosystem Partnership Fund (CEPF) grant CEPF-108984 “Amphibian Conservation in the Abra de Zamora Key Biodiversity Area of Ecuador” granted to DAO, PS and DS.</p> |

**Unfunded studies**

Enter: *The author(s) received no specific funding for this work.*

**Funded studies**

Enter a statement with the following details:

- Initials of the authors who received each award
- Grant numbers awarded to each author
- The full name of each funder
- URL of each funder website
- Did the sponsors or funders play any role in the study design, data collection and analysis, decision to publish, or preparation of the manuscript?
- **NO** - Include this sentence at the end of your statement: *The funders had no role in study design, data collection and analysis, decision to publish, or preparation of the manuscript.*
- **YES** - Specify the role(s) played.

\* typeset

**Competing Interests**

Use the instructions below to enter a competing interest statement for this submission. On behalf of all authors, disclose any [competing interests](#) that could be perceived to bias this work—acknowledging all financial support and any other relevant financial or non-financial competing interests.

This statement **will appear in the published article** if the submission is accepted. Please make sure it is accurate. View published research articles from [PLOS ONE](#) for specific examples.

The authors have declared that no competing interest exist

**NO authors have competing interests**

Enter: *The authors have declared that no competing interests exist.*

**Authors with competing interests**

Enter competing interest details beginning with this statement:

*I have read the journal's policy and the authors of this manuscript have the following competing interests: [insert competing interests here]*

\* typeset

**Ethics Statement**

N/A

Enter an ethics statement for this submission. This statement is required if the study involved:

- Human participants
- Human specimens or tissue
- Vertebrate animals or cephalopods
- Vertebrate embryos or tissues
- Field research

Write "N/A" if the submission does not require an ethics statement.

General guidance is provided below. Consult the [submission guidelines](#) for detailed instructions. **Make sure that all information entered here is included in the Methods section of the manuscript.**



**Format for specific study types**

**Human Subject Research (involving human participants and/or tissue)**

- Give the name of the institutional review board or ethics committee that approved the study
- Include the approval number and/or a statement indicating approval of this research
- Indicate the form of consent obtained (written/oral) or the reason that consent was not obtained (e.g. the data were analyzed anonymously)

**Animal Research (involving vertebrate animals, embryos or tissues)**

- Provide the name of the Institutional Animal Care and Use Committee (IACUC) or other relevant ethics board that reviewed the study protocol, and indicate whether they approved this research or granted a formal waiver of ethical approval
- Include an approval number if one was obtained
- If the study involved *non-human primates*, add *additional details* about animal welfare and steps taken to ameliorate suffering
- If anesthesia, euthanasia, or any kind of animal sacrifice is part of the study, include briefly which substances and/or methods were applied

**Field Research**

Include the following details if this study involves the collection of plant, animal, or other materials from a natural setting:

- Field permit number
- Name of the institution or relevant body that granted permission

**Data Availability**

Authors are required to make all data underlying the findings described fully available, without restriction, and from the time of publication. PLOS allows rare exceptions to address legal and ethical concerns. See the [PLOS Data Policy](#) and [FAQ](#) for detailed information.

Yes - all data are fully available without restriction

A Data Availability Statement describing where the data can be found is required at submission. Your answers to this question constitute the Data Availability Statement and **will be published in the article**, if accepted.

**Important:** Stating 'data available on request from the author' is not sufficient. If your data are only available upon request, select 'No' for the first question and explain your exceptional situation in the text box.

Do the authors confirm that all data underlying the findings described in their manuscript are fully available without restriction?

**Describe where the data may be found in full sentences. If you are copying our sample text, replace any instances of XXX with the appropriate details.**

- If the data are **held or will be held in a public repository**, include URLs, accession numbers or DOIs. If this information will only be available after acceptance, indicate this by ticking the box below. For example: *All XXX files are available from the XXX database (accession number(s) XXX, XXX).*
- If the data are all contained **within the manuscript and/or Supporting Information files**, enter the following:  
*All relevant data are within the manuscript and its Supporting Information files.*
- If neither of these applies but you are able to provide **details of access elsewhere**, with or without limitations, please do so. For example:

*Data cannot be shared publicly because of [XXX]. Data are available from the XXX Institutional Data Access / Ethics Committee (contact via XXX) for researchers who meet the criteria for access to confidential data.*

*The data underlying the results presented in the study are available from (include the name of the third party*

All relevant data are within the manuscript and its Supporting Information files.

*and contact information or URL).*

- This text is appropriate if the data are owned by a third party and authors do not have permission to share the data.

\* typeset

Additional data availability information:

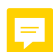

1  **Red List assessment for amphibian species of Ecuador: a**  
2 **multidimensional approach for their conservation**

3

4 H. Mauricio Ortega-Andrade<sup>1,13</sup>, Marina Rodes Blanco<sup>1</sup>, Diego F. Cisneros-  
5 Heredia<sup>2</sup>, Nereida Guerra Arévalo<sup>1</sup>, Karima Gabriela López de Vargas-  
6 Machuca<sup>3</sup>, Juan C. Sánchez-Nivicela<sup>4</sup>, Diego Armijos-Ojeda<sup>5</sup>, José Francisco  
7 Cáceres Andrade<sup>6</sup>, Carolina Reyes Puig<sup>2</sup>, Amanda Belén Quezada Riera<sup>7</sup>, Paul  
8 Székely<sup>8</sup>, Octavio R. Rojas Soto<sup>9</sup>, Diana Székely<sup>8</sup>, Juan M. Guayasamin<sup>10</sup>,  
9 Fausto Rodrigo Siavichay Pesántez<sup>11</sup>, Luis Amador<sup>12</sup>, Raquel Betancourt<sup>13</sup>,  
10 Salomón M. Ramírez-Jaramillo<sup>14</sup>, Bruno Timbe-Borja<sup>8</sup>, Miguel Gómez Laporta<sup>14</sup>,  
11 Juan Fernando Webster Bernal<sup>15</sup>, Luis Alfredo Oyagata Cachimuel<sup>15</sup>, Daniel  
12 Chávez Jácome<sup>14</sup>, Valentina Posse<sup>7</sup>, Carlos Valle-Piñuela<sup>15</sup>, Daniel Padilla  
13 Jiménez<sup>15</sup>, Juan Pablo Reyes Puig<sup>16</sup>, Andrea Terán-Valdez<sup>17</sup>, Luis A. Coloma<sup>17</sup>,  
14 Ma. Beatriz Pérez Lara<sup>13</sup>, Sofía Carvajal-Endara<sup>17</sup>, Miguel Urgilés<sup>13</sup> and Mario H.  
15 Yánez Muñoz<sup>13</sup>

16

17 <sup>1</sup> Grupo de Biogeografía y Ecología Espacial, Universidad Regional Amazónica  
18 Ikiam, Tena, Ecuador.

19 <sup>2</sup> Universidad San Francisco de Quito USFQ, Instituto de Diversidad Biológica  
20 Tropical iBIOTROP, Quito, Ecuador

21 <sup>3</sup> Universidad de La Laguna, Santa Cruz de Tenerife, España

22 <sup>4</sup> Universidad Nacional de Colombia, Bogotá, Colombia.

23 <sup>5</sup> Laboratorio de Ecología Tropical y Servicios Ecosistémicos (EcoSs-Lab),  
24 Departamento de Ciencias Biológicas, Universidad Técnica Particular de Loja,  
25 Loja 1101608, Ecuador.

26 <sup>6</sup> Parque Nacional Cajas ETAPA EP, Cuenca, Ecuador.

27 <sup>7</sup> Museo de Zoología de la Universidad del Azuay, Cuenca, Ecuador

28 <sup>8</sup> Laboratorio de Ecología Tropical y Servicios Ecosistémicos (EcoSs-Lab),  
29 Departamento de Ciencias Biológicas, Universidad Técnica Particular de Loja,  
30 Loja 1101608, Ecuador.

31 <sup>9</sup> Instituto de Ecología, A. C., Xalapa, México

32 <sup>10</sup> Laboratorio de Biología Evolutiva, Colegio de Ciencias Biológicas y  
33 Ambientales COCIBA, Instituto Biósfera USFQ, Universidad San Francisco de  
34 Quito, Quito, Ecuador.

35 <sup>11</sup> Centro de Conservación de Anfibios AMARU, Cuenca, Ecuador

36 <sup>12</sup> Instituto de Ciencias Ambientales y Evolutivas, Doctorado en Ciencias m.  
37 Ecología y Evolución, Universidad Austral de Chile, Valdivia, Chile.

38 <sup>13</sup> Instituto Nacional de Biodiversidad, Quito, Ecuador

39 <sup>14</sup> Independent researcher

40 <sup>15</sup> Ministerio del Ambiente y Agua, Quito, Ecuador

41 <sup>16</sup> Fundación Ecominga/Fundación Oscar Efrén Reyes, Baños, Ecuador.

42 <sup>17</sup> Centro Jambatu de Investigación y Conservación de Anfibios, Fundación  
43 Jambatu, Quito, Ecuador.

44

#### 45 **Author contribution**

46 HMOA, MRB, NGA, DFCH, KGL and MHYM contributed in the logistics and  
47 organization of the workshops; HMOA, MRB, DFCH, NGA, KGL, JCSN, DAO,  
48 JCSN, CRP, ORRS, JMG, BTB and MHYM contributed in the concept and ideas  
49 on the manuscript design and analysis; HMOA, MRB, DFCH, NGA, KGL, JCSN,  
50 DAO, JCSN, CRP, ABQR, PS, DS, JMG, FRSP, LA, RB, SMRJ, BTB, MGL,  
51 JFWB, DCJ, VP, CVP, DPJ, JPRP, ATV, LAC, MBPL, SCE and MHYM  
52 contributed in data curation, codification and red list assessment criteria; HMOA,  
53 MRB, DFCH, NGA, KGL and MHYM analyze the data, generated models,  
54 designed figures and tables, and wrote the draft version of the manuscript; all  
55 authors reviewed, commented, and approved the final version of the manuscript;  
56 all authors declared not conflict of interest.

57

58 **Abstract**

59 Ecuador is one of the most biodiverse countries in the world, but faces severe  
60 pressures and threats to its natural ecosystems. Numerous species have  
61 declined and require to be objectively evaluated and quantified, as a step towards  
62 the development of conservation strategies. Herein, we present an updated Red  
63 List Assessment for amphibian species of Ecuador, with one of the most detailed  
64 and complete coverages for any Ecuadorian taxonomic group to date. Based on  
65 standardized methodologies that integrate taxonomic work, spatial analyses, and  
66 ecological niche modeling, we assessed the extinction risk and identified the main  
67 threats for all Ecuadorian native amphibians (635 species), using the IUCN Red  
68 List Categories and Criteria. Our evaluation reveals that 57% (363 species) are  
69 categorized as Threatened, 12% (78 species) as Near Threatened, 4% (26  
70 species) as Data Deficient, and 27% (168 species) as Least Concern. Our  
71 assessment almost doubles the number of threatened species in comparison with  
72 previous evaluations. In addition to habitat loss, the expansion of the agricultural  
73 frontier and other anthropogenic threats (roads, human settlements, and  
74 mining/oil activities) amplify the incidence of other pressures as relevant  
75 predictors of ecological integrity. Potential synergic effects with climate change  
76 and emergent diseases (apparently responsible for the sudden declines), has a  
77 particular importance amongst the threats sustained by Ecuadorian amphibians.

78 **Additional.** Most threatened species are distributed in montane forests and  
79 paramo habitats of the Andes, with nearly 10% of them occurring outside the  
80 National System of Protected Areas of the Ecuadorian government. Also, it is  
81 essential to place research efforts on little known species categorized as Data  
82 Deficient (DD), which may turn out to be endangered. Such integration will help

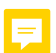

83 in better management and conservation of amphibian species in countries of the  
84 Tropical Andes Biodiversity Hotspot, like Ecuador. This assessment was a key  
85 step to develop the National Action Plan for the Conservation of Ecuadorian  
86 amphibians.

87

## 88 **Keywords**

89 Conservation, ecological niche modeling, threat modeling, risk categories.

## 90 **Resumen**

91 Ecuador es uno de los países con mayor biodiversidad del mundo, pero enfrenta  
92 severas presiones y amenazas a sus ecosistemas naturales. Numerosas  
93 especies han disminuido y requieren ser evaluadas y cuantificadas  
94 objetivamente, como un paso hacia el desarrollo de estrategias de conservación.  
95 A continuación, presentamos la Evaluación de la Lista Roja actualizada para  
96 especies de anfibios de Ecuador, basado en una de la más detallada y completa  
97 revisión hasta la fecha. Con base en metodologías estandarizadas que integran  
98 análisis taxonómicos, espaciales y modelado de nichos ecológicos, evaluamos  
99 el riesgo de extinción e identificamos las principales amenazas para todos los  
100 anfibios nativos ecuatorianos (635 especies), utilizando las Categorías y Criterios  
101 de la Lista Roja de la UICN. La evaluación revela que el 57% (363 especies)  
102 están categorizadas como Amenazadas, el 12% (78 especies) como Casi  
103 Amenazadas, el 4% (26 especies) como Datos Insuficientes y el 27% (168  
104 especies) como Preocupación Menor. Nuestra evaluación casi duplica el número  
105 de especies amenazadas en comparación con evaluaciones anteriores. Además  
106 de la pérdida de hábitat, la expansión de la frontera agrícola y otras amenazas  
107 antropogénicas (carreteras, asentamientos humanos y actividades mineras /

108 petroleras) amplifican la incidencia de otras presiones como predictores  
109 relevantes de la integridad ecológica. Los potenciales efectos sinérgicos con el  
110 cambio climático y las enfermedades emergentes (aparentemente responsables  
111 de los descensos repentinos), tiene una importancia particular entre las  
112 amenazas que sufren los anfibios ecuatorianos. **Adicional.** La mayoría de las   
113 especies amenazadas se distribuyen en los bosques montanos y los hábitats de  
114 páramo de los Andes, y casi el 10% de ellas se encuentran fuera del Sistema  
115 Nacional de Áreas Protegidas del gobierno ecuatoriano. Además, es  
116 fundamental centrar los esfuerzos de investigación en especies poco conocidas  
117 categorizadas como Datos Insuficientes (DD), que pueden resultar en peligro de  
118 extinción. Tal integración ayudará a un mejor manejo y conservación de las  
119 especies de anfibios en países del Hotspot de Biodiversidad de los Andes  
120 Tropicales, como Ecuador. Esta evaluación fue un paso clave para desarrollar el  
121 Plan de Acción Nacional para la Conservación de los Anfibios Ecuatorianos.

122 **Palabras clave**

123 Categorías de riesgo, conservación, modelo de amenaza, modelos de nicho  
124 ecológico.

125



## 126 Introduction

127 One of the main aims of conservation biology is to assess, understand, and  
128 mitigate threats to biodiversity. The International Union for Conservation of  
129 Nature's (IUCN) Red List of Threatened Species is a powerful tool that allows not  
130 only to estimate species extinction risks, but also to prioritize conservation efforts  
131 [1]. The Red List Assessment is widely used by experts on several groups of  
132 plants and animals worldwide, as it applies standardized methods to assess  
133 threats and extinction risk, based on relevant quantitative and qualitative criteria  
134 [1-4].

135 Amphibians are one of the most diverse vertebrate groups in the Neotropical  
136 region [5]. In addition to presenting an extraordinary richness specific to each  
137 ecosystem, they are one of the most threatened taxa [6]. Their ectothermy makes  
138 them particularly vulnerable to environmental changes, mainly related to  
139 temperature and humidity, but also to infectious diseases [7-9]. Therefore, habitat  
140 loss, climate change, and diseases represent important threats to their  
141 populations [7,10-12].

142 Ecuador is one of the countries with the highest number of amphibian species  
143 [13-16]. Ecuadorian amphibians are considered among the most threatened in  
144 South America, due to increased rates of habitat loss and deforestation, mainly  
145 by cattle raising, mining, oil exploitation, and expansion of agricultural frontier [17-  
146 22]. Moreover, some historically conspicuous genera (harlequin frogs [*Atelopus*  
147 spp.], marsupial frogs [*Gastrotheca* spp.], and Andean water frogs [*Telmatobius*  
148 spp.]) have suffered dramatic populations declines or extinctions [9,23-25], that  
149 seem to be related to the fungal panzootic *Batrachochytrium dendrobatidis* [9],  
150 although other factors, such as climate change may be also be related [11].

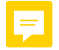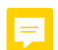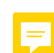

151 Based on the data gathered by the IUCN Red List Assessment, amphibians are  
152 the most threatened vertebrates globally, and the proportion of threatened  
153 species increases more rapidly than both birds and mammals [26-28]. By March  
154 2020, from an estimated 8126 amphibian species, 6824 were evaluated (84% of  
155 the known species), and 2202 (32% of the evaluated species) were considered  
156 threatened [species assessed as Critically Endangered (CR), Endangered (EN),  
157 or Vulnerable (VU)]. However, globally, the proportion of threatened amphibian  
158 species would increase in a range between 41 and 53% if we considered that  
159 several Data Deficient (DD) species are likely to be in fact threatened with  
160 extinction [29,30].

161 In 2004, the Global Amphibian Assessment (GAA) published by the IUCN,  
162 Conservation International and NatureServe included, for the first time, the  
163 categorization for amphibian species of Ecuador; this was subsequently updated  
164 in 2006 and 2008 (www.iucn-amphibians.org). As a result of this process 447  
165 amphibian species were evaluated, from which 165 (37%) were found to be  
166 threatened or extinct [4]. In 2011, an updated assessment was published for  
167 Ecuadorian species [28], with 465 evaluated species, 142 (30.5%) of which were  
168 found to be threatened (CR, EN or VU) and nearly 29% classified as DD.

169 Since 2015, the Ecuadorian Ministry of Environment and Water (MAAE) has been  
170 leading the project "Conservation of Ecuadorian amphibian biodiversity and  
171 sustainable use of genetic resources". One of the main components of the project  
172 is focused on understanding the conservation status of the amphibians of  
173 Ecuador. Thus, the goals of our study are to: a) evaluate and update the  
174 extinction risk status of Ecuadorian amphibians, b) analyze spatial patterns of  
175 threatened species related to endemism, protected areas, and ecological regions

176 in Ecuador, and c) suggest actions towards a robust and objective methodology  
177 to evaluate species conservation status.

## 178 **Materials and methods**

### 179 ***Amphibian database compilation***

180 In order to gather the distribution data for Ecuadorian amphibians, we compiled  
181 occurrence records along the complete distributional range per species from:  
182 Global Biodiversity Information Facility (GBIF; <https://www.gbif.org>), iNaturalist  
183 (<https://www.iNaturalist.org>), VertNet (<https://www.vetnet.org>), Batrachia  
184 (<https://www.batrachia.com>), Anfibios del Ecuador [15], Museo de Zoología de la  
185 Pontificia Universidad Católica del Ecuador (QCAZ; <https://bioweb.bio>), as well  
186 as from national databases shared by the Instituto Nacional de Biodiversidad  
187 (INABIO), Museo de Zoología de la Universidad Técnica Particular de Loja  
188 (MUTPL), Museo de Zoología de la Universidad del Azuay (MZUA), Museo de  
189 Zoología de la Universidad Tecnológica Indoamérica (MZUTI), Museo de  
190 Zoología de la Universidad San Francisco de Quito (ZSFQ), Centro Jambatu  
191 (CJ), Proyecto Conservación de Anfibios y Recursos Genéticos del Ministerio de  
192 Ambiente del Ecuador (MAE-PARG), and records/photographs of specimens  
193 collected in the field and shared by the authors in the Red List Assessment  
194 workshops (S1 Table). The final dataset included data up to 31th October 2020  
195 (Fig 1).

196

197 We followed the nomenclature proposed by Grant et al. [31] for Dendrobatidae,  
198 Guayasamin et al. [32] for Centrolenidae, Castroviejo-Fisher et al. [33] for  
199 Hemiphractidae, Hedges et al. [34] for Strabomantidae; all other taxa groups  
200 follow AmphibiaWEB [13] and The Amphibian Species of the World [16]. Records

201 were error-checked and improved through a taxonomic assessment on  
202 specimens in scientific collections, validation of records based on biogeographic  
203 distribution, phylogenetic and taxonomic analyses published elsewhere [35-43],  
204 a systematic literature review and by taxonomic discussions in eight workshops  
205 (2017 to 2020) that were held with 33 expert herpetologists from all over the  
206 country, including the authors of this paper. Workshop participants were  
207 distributed on boards according to taxonomic families and geographic regions.  
208 Spatialized data per species was revised in QGIS 3.4.14, along with geospatial  
209 data as watersheds, digital elevation model, and base maps, in order to assess  
210 for data consistency [44]. As a double-check, information of elevation was  
211 extracted for every data point and represented in boxplots to find outliers and  
212 other possible mistakes. Problematic occurrence data, either at georeferenced or  
213 taxonomic level, were removed from the dataset. Taxonomic experts validated  
214 the data and highlighted errors or inaccuracies during workshops. Records with  
215 incorrect georeferenced data were fixed using the Google Satellite layer in QGIS,  
216 only when the collectors verified the exact location. This process aimed to obtain  
217 a clean and debugged database that met appropriate standards for ecological  
218 niche modeling [45-47], biogeographic analyses [48,49], and Red List  
219 Assessment [13,17,22], in accordance with Darwin Core guidelines  
220 (<https://dwc.tdwg.org/>).

### 221 ***Environmental Data***

222 Climate variables for current and future scenarios were downloaded from the  
223 WorldClim2 database [50] (<http://www.worldclim.org>). We obtained 15 climatic  
224 variables at a 30 seconds (~1 km<sup>2</sup>) spatial resolution; we excluded the four layers  
225 that combine precipitation and temperature information into the same layer due

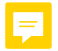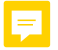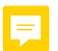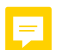

226 to spatial anomalies [51]. To characterize future climate conditions, we used data  
227 for two IPCC representative concentration pathways emissions scenarios (RCP  
228 4.5 and 8.5) from the Hadley Global Environment Model 2 - Earth System  
229 (HadGEM2-ES) global circulation model (GCM) [50]. Future RCP 4.5 scenarios  
230 assume relative slow income growth, increasing human population and modest  
231 improvements in technology and energy intensity, leading to a higher demand for  
232 energy and increasing greenhouse gas emissions in the long-term considering  
233 an absence of climate change mitigation policies, whereas the RCP 8.5 scenario  
234 represents a higher predicted greenhouse gas emissions [52].

### 235 **Data Analysis and Ecological Modeling**

236 Species were divided into two groups: 1) those that could be modeled, and 2)  
237 those that could not be modeled due to low number of occurrence points (fewer  
238 than 5 localities) occurrence points situated in closely-located pixels, or models  
239 not statistically significant by AUC thresholds. For the first group, we implemented  
240 a modeling process with MaxENT [53]. The characteristics of the model (creation,  
241 calibration, selection, and evaluation) were carried out in *kuenm* R package [54].  
242 As a first step, the Jackknife procedure and the correlation statistics (-0.8 to 0.8  
243 in *Pearson r* values) were used to assess the importance of the variables in a first  
244 run with all values by default.

245 Once the climate variables were selected, we obtained candidate models with  
246 different parameters (seven multiplication regulators - 0.1, 0.4, 0.7, 1, 2, 3, 4 -  
247 and seven feature classes - linear (*l*), quadratic (*q*), product (*p*), and all the  
248 combinations *lq*, *lp*, *pq*, *lqp*-). The maximum number of background points was  
249 10,000. We randomly selected 70% of the data for training and used the  
250 remaining 30% for testing. A total of 500 runs were set for model building. The

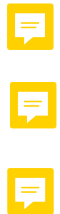

251 best model was selected according to the criteria of omission rate < 10% and  
252 delta AIC > 2.

253 An important step in ecological niche modeling is to define a calibration region,  
254 the accessible area ("M", hereinafter) for species [45,47,55]. In this study, we  
255 delimited "M" using the biogeographic provinces for the Neotropics [56],  
256 watersheds, and a digital elevation model to find the physical barriers that  
257 determine the accessibility area of each amphibian species. We found similar  
258 distribution patterns among several species, reiterating the same physical  
259 barriers (i.e. the Andes, basins, mountain ranges, etc.). For these reasons, some  
260 generic "M" were constructed for the different regions (i.e. highlands, coast, and  
261 Amazon), and these were assigned to each of the species.

262 In the case of taxa that lacked enough data points for ecological modeling, the  
263 Area of Occupancy (AOO) was calculated [57] in R software ([https://www.r-](https://www.r-project.org/)  
264 [project.org/](https://www.r-project.org/)), using a 2 x 2 km grid created in QGIS 3.4.14 and extracting and  
265 counting the number of cells occupied by the species.

### 266 ***Cumulative Species Richness Model***

267 The cumulative species richness models (CSR) were performed adding up the  
268 results of the Maxent binary models (suitability area) and Area of Occupancy  
269 (AOO) for each of the families and conservation categories. The results are  
270 shown using the **tmap** package [58] in R software (<https://www.r-project.org/>).

271 **Endemic species** were determined based on the categories proposed by Ron et  
272 al. [15]. We used a Kruskal-Wallis test and a Wilcoxon test for paired samples to  
273 compare groups of endemic/ non-endemic taxa and conservation threat  
274 categories related to altitude ranges.

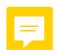

## 275 ***Threat Model***

276 To have a better understanding of the potential impacts of human activities on  
277 the distribution of Ecuadorian amphibians, we followed standardized criteria to  
278 define risk elements and potential threats, based on expert supervision for  
279 hierarchical classification by IUCN-CMP (International Union for Conservation of  
280 Nature - Conservation Measures Partnership) [3,57,59]. Overall, eight major  
281 threats with 34 subcategories were used to develop a threat or Environmental  
282 Risk Surface (ERS) model (Table 1).

283 We used a standard lexicon for classifications of threats [59]. These elements  
284 were spatially mapped (ArcMap v.10) as points, polygons, and lines, and then  
285 converted to raster files to calculate Euclidean distances of each threat. The  
286 Influence Distance (meters) was assigned to each subcategory based on buffer  
287 areas with a respective decay function, giving values according to the intensity of  
288 anthropogenic and natural threats. To reduce subjectivity by decision-making  
289 bias, regarding the ascription of Intensity to each risk element, we applied a Multi-  
290 Criteria Decision Making (MCDM) through Analytic Hierarchy Process (AHP) on  
291 the analysis (S3 Table). Once the inputs were obtained, the process was  
292 automatized using *ModelBuilder* from ArcMap, with an iterative process per  
293 subcategory (S1 Fig.). Finally, the outputs were overlapped with a raster  
294 calculator to develop an ERS, which considers a weighted overlay of amphibians-  
295 specific threats in Ecuador, with a resolution of 30 m x 30 m.

## 296 ***Red List Assessment***

297 The conservation status of amphibian species in Ecuador was assessed following  
298 the protocols, standards, criteria, and subcriteria proposed by the IUCN [4]. The  
299 dataset was compiled in a geospatial database used to assess the distribution

300 and threats in a series of workshops promoted by the working group led by the  
301 authors. Data by species were analyzed mainly by number of records (N),  
302 **percentage of records in Ecuador (%)**, area of occurrence (AOO, km<sup>2</sup>), suitability  
303 area reconstructed by **niche modeling** (km<sup>2</sup>), environmental contractions [60,61]  
304 in future scenarios (% reduction relative to current ecological model), and values  
305 higher than 0.5 (in the third quartile) of the threat model.

306 All statistics (43 in total) used to apply criteria and subcriteria to assess the  
307 conservation status of a given species are detailed in S2 Table. Additional data  
308 related to population size or decline of the number of mature individuals were  
309 documented from literature or data from the authors provided in the workshops.  
310 As additional support for the evaluation, we used basic maps for National System  
311 of Protected Areas (SNAP - Sistema Nacional de Áreas Protegidas), Forestal  
312 Heritage, Protected forests and vegetation, Conservation Areas, Ramsar  
313 wetlands, Land Use and forested areas (until 2018) and Natural Regions of  
314 Ecuador, downloaded in vector format from national servers [28,62-64]. We  
315 calculated the threatened representativeness in a taxonomic group (TR): the  
316 number of threatened taxa / total number of taxa per family X 100. Comparative  
317 assessment of threatened taxa regarding the last National Red List follows Ron  
318 et al. [28].

319

## 320 **Results**

### 321 ***Red List Assessment***

322 A total of 126 databases belonging to various institutions and on-line resources  
323 were used to consolidate the dataset for the Ecuadorian amphibians (S1 Table).

324 The final dataset included 37,328 records, **from** which 29,189 were located in



325 Ecuador, of a total of 635 taxa (plus *Rana catesbeiana*, as an invasive species),  
326 which represent 100% of the species currently reported for Ecuador (Fig 2). GBIF,  
327 QCAZ, and INABIO were the data providers with the most representative  
328 collections included in the current Red List evaluation (Table 2).

329

330 Overall, the IUCN Red List assessment resulted in the assignment of a  
331 threatened category (CR, EN, VU) for 57% of the Ecuadorian amphibian species,  
332 while 12% were considered as Near Threatened (NT), 4% as DD, and 27% as  
333 Least Concern (LC) (Fig 2, Table 3). Eighty-five taxa were considered as Critically  
334 Endangered CR (13.4%), including taxa from the genera *Atelopus* (24 spp.),  
335 *Hyloxalus* (9 spp.), and *Pristimantis* (12 spp.); 147 taxa (23.1%) were considered  
336 Endangered (EN), and 131 (20.6%) qualified as Vulnerable (VU).  
337 Strabomantidae is the family with the highest number of threatened taxa (CR =  
338 18 species, 3%, EN = 67 species, 11.1%; VU = 87 species, 14.5%, respectively).  
339 Strabomantidae (28.6%), Bufonidae (7%), and Centrolenidae (6.3%) harbor 42%  
340 of the total threatened species in Anura. An additional 78 taxa (12.3%) were  
341 evaluated as NT, and 168 as LC (26.4%). Finally, 26 taxa (4.1%) are considered  
342 as DD because the information was insufficient for a proper assessment of their  
343 conservation status (Fig 3, S3 Table). Regarding the taxa under threatened  
344 categories, 56.7% (341 species) of Anura, 72.7% (8 species) of Caudata, and  
345 60.9% (9 species) of Gymnophiona qualified for one of these categories (Table  
346 3). A total of 16 genera had all of their taxa considered as threatened [i.e.  
347 *Atelopus* (25 spp.), *Lynchius* (4 spp.), *Epicrionops* (3 spp.), *Telmatobius* (3 spp.),  
348 *Ctenophryne* (3 spp.), *Sachatamia* (3 spp.)]; seven genera had 70–90% of taxa  
349 as threatened [i.e. *Hyloxalus* (22 spp.), *Nymphargus* (15 spp.), *Gastrotheca* (14

350 spp.); 12 genera had 50-70% as threatened [i.e. *Pristimantis* (155 spp.),  
351 *Hyloscirtus* (13 spp.), *Caecilia* (7 spp.)] (Fig 3, S5 Table).

352

353 A total of 287 species (45%) occurring in Ecuador are endemic. Four families  
354 (*Andinobates*, *Ectopoglossus*, *Paruwrobates* and *Telmatobius*) have all their  
355 endemic species as threatened; the families Bufonidae, Dendrobatidae,  
356 Strabomantidae have 70–90% of their endemic species categorized as  
357 threatened. 18 genera have all of their endemic taxa evaluated as threatened (i.e.  
358 *Atelopus*, *Lynchius*, *Niceforonia*, *Paruwrobates*, *Rhaebo*, *Telmatobius*) and 10  
359 (*Caecilia*, *Chiasmocleis*, *Epipedobates*, *Espadarana*, *Gastrotheca*, *Hyloscirtus*,  
360 *Hyloxalus*, *Nymphargus*, *Osornophryne*, *Pristimantis*) have been identified with  
361 70-90% of their endemic species as threatened (S5 Table). Our assessment  
362 incorporates 178 species that had never been evaluated; also, we present the  
363 conservation status for 127 species that were considered as DD in previous red  
364 list evaluations (S3 Table).

365

### 366 **Major Threats**

367 The ERS model is presented in S2 Fig This model reveals high-risk areas (red)  
368 mainly located in the vicinity of large and medium-sized cities: Guayaquil (Coast),  
369 Quito (Andes), and Lago Agrio (Amazon). The medium-to-high-risk areas  
370 (orange) are primarily placed on the eastern and western foothills of the Andes  
371 mountain range, northern Amazonia, and northern Coast, with high threats  
372 scattered on central Coast and Amazonia regions, nearby roads. Medium-risk  
373 areas (yellow) can be identified along the Andes, as well as in the center-southern  
374 part of the Coast. We noticed that the areas of low impact (green) are isolated,

375 related to protected areas, inaccessible forests, and mountain ranges located in  
376 northwestern Ecuador, Amazonian foothills of the Andes, and southern Amazonia  
377 (Fig 4).

378 Agriculture, transport, infrastructure (i.e. roads, oil pipelines, etc.), production  
379 areas (mining, oil camps, etc.) and deforestation are the most important threats  
380 for Ecuadorian amphibians, with 70-98% taxa associated to each of these  
381 categories (Fig 5, S7 Table). Near to 21-36% of assessed species will have a  
382 contraction in more than a half of the area that represents their ecological niches  
383 (loss of environmental conditions, RCP 45/85) in future scenarios. We  
384 documented the presence of *Rana catesbeiana*, an introduced species, in  
385 several locations mainly distributed in southern slopes of the Andes and coastal  
386 regions.

387

### 388 ***Biogeographical patterns***

389 Cumulative species richness models (CSRM) by threatened category are shown  
390 in Figure 6 (models per species, genera, and families are detailed in  
391 Supplementary Material SM4). CSRM for threatened species generated a  
392 maximum value of 57 species overlapped per pixel. A high concentration of  
393 threatened taxa is related to the northern montane forests in both sides of the  
394 Andes, paramos, and valleys in the central Andes and eastern montane forest  
395 towards southern to Cutucú and Condor ranges and foothills of the Amazon basin  
396 (Fig 6).

397

398 CR taxa CSRM generated a maximum value of 12 species overlapped per pixel.  
399 A high concentration of taxa is located along both sides of the Andes, in northern

400 Ecuador near Cayambe Coca Ecological Reserve and Napo Sumaco-Galeras  
401 National Park, and the montane forest of southeastern Ecuador close to the  
402 Cutucú and Condor Mountain ranges. Models for EN taxa generated a maximum  
403 value of 28 species overlapped per pixel. The highest concentration of taxa was  
404 in the northwestern Andes, in areas west of Pichincha volcano, Mindo,  
405 Guayllabamba basin in Esmeraldas, Pichincha, Imbabura and Carchi provinces.  
406 Models for VU taxa generated a maximum value of 27 species overlapped per  
407 pixel. The higher concentration of VU taxa was located along with mountain  
408 forests and foothills in both sides of the Andes, in the Chocó region, in nearby  
409 areas of Napo Sumaco-Galeras National Park and southeastern Ecuador (Fig 6).

410

411 Locality records of threatened species **reveal** differential patterns of distribution  
412 depending on the family (Fig 7). For example, **Bufonidae**, **Centrolenidae**,  
413 **Dendrobatidae**, and Strabomantidae are related to the Andes and foothills.  
414 Telmatobiidae, which have all of their species categorized as CR, is restricted to  
415 southern Andes (Fig 7). Strabomantidae is the only family that presents CR taxa  
416 limited to the coastal region. On the other hand, **Hylidae** and **Leptodactylidae**  
417 have been recorded on both sides of the Andes, related to foothills and tropical  
418 forests. Threatened salamanders (Caudata, Plethodontidae) have been  
419 registered in northern Ecuador, towards foothills on both sides of the Andes, and  
420 tropical forests in the Chocó region (Fig 7).

421

422 Records of NT taxa are distributed on both sides of the Andes **by** Centrolenidae,  
423 Dendrobatidae, and Hylidae; while Hemiphractidae and Leptodactylidae are  
424 represented mainly in the Amazon basin and eastern slopes of the Andes. A

425 wider distribution of locality records in Ecuador (except the dry area in the coastal  
426 region) of NT taxa is identified for Strabomantidae. DD taxa are mostly located in  
427 the foothills and lowlands along the Amazon region, mainly for Bufonidae,  
428 Hylidae, Aromobatidae, and Centrolenidae; also, DD species in families  
429 Strabomontidae have been registered in the Andes (Fig 8).

430

431 The database had records from lowlands to highlands in Ecuador (min = 6 m, 1st  
432 Qu. = 821 m, median = 1694 m, mean = 1760 m, 3rd Qu. = 2728 m, max. = 5299  
433 m). We report differences in the distribution of Red List categories and endemic  
434 taxa related with altitude [KW test ( $\chi^2$ ) = 591.58, d.f. = 5,  $p < 2.2e-16$ ]. Threatened  
435 species were distributed commonly in highlands, montane forests, and foothills  
436 of Andes i.e. CR (median = 2240 m,  $n = 1159$ ), EN (median = 1862 m,  $n = 2096$ ),  
437 VU (median = 1533 m,  $n = 3599$ ), compared with NT taxa (Fig 7).

438

439 The highest number of species was essentially encountered in three natural  
440 regions: eastern montane (318 taxa), western montane (224 taxa), and the  
441 Amazon (208 taxa). The montane regions also harbored the highest proportions  
442 of threatened, 27% for each one, and DD of the total species in Ecuador.  
443 Regarding species richness in each region, the paramo had the highest  
444 proportion of threatened species (80%), followed by the western montane (74%),  
445 Andean shrub (69%), and western foothills (65%). (Fig 9, S6 Table).

446

447 The Vegetation and Protected Forests and the SNAP protected areas are the  
448 most important types of protected areas for threatened amphibian species, with  
449 an overall record of 203 (32%) and 196 species (31%), respectively (Fig 10, S6

450 Table). Sixty-five species (10%) are not included in any protected area, with 26  
451 rated as CR, 25 as EN, and 14 as VU.

452

## 453 **Discussion**

### 454 ***The current conservation status of Ecuadorian amphibians***

455 The conservation status of 635 (plus *R. catesbeiana*, as invasive species)  
456 amphibian species was assessed, which represents all the native species  
457 documented to date for Ecuador (S4 Table). Herein we report that 57% of the  
458 evaluated amphibian species are classified under some extinction risk using the  
459 IUCN Red List standards (13% CR, 23% EN, and 21% VU), with a further 12%  
460 falling into the NT category, and 4 % of DD taxa. Our data present a rather  
461 pessimistic situation of one of the most diverse countries in amphibian species in  
462 the World [16]. This is especially true as the data are correlated with the fact that  
463 Ecuador also boasts one of the highest deforestation rates [21,65], an immense  
464 pressure for mining development [66], and an important expected human population  
465 growth in the future [67].

466 Compared to the previous Ecuadorian Amphibian Red List [28], we add  
467 assessments for 174 species, and additionally provide a status evaluation for 127  
468 species that were considered DD at that time (S3 Table). As a result of our study,  
469 the conservation status of 139 taxa has changed - 81 species have now been  
470 found to qualify in a higher Red List category, while 58 have been assigned to a  
471 lower extinction risk category. The differences are probably due to broader  
472 knowledge, including taxonomic revisions and species descriptions, but also to  
473 the different assessment procedures.

474 **Amidst a general trend of loss of biodiversity**, some amphibian taxa show a  
475 phylogenetic sensitivity to change, as they are considered at high risk of  
476 extinction in their entirety (i.e. genus *Atelopus*, *Telmatobius*, *Lynchius*, etc.), most  
477 likely as a result of their distinctive life-history traits [24,40,68-71]. Because they  
478 contribute uniquely to the functioning of their communities, the loss of such  
479 species is especially worrisome as it is expected to have a disproportionate  
480 impact on the stability of local ecosystems, beyond their taxonomic loss [11]. This  
481 is of particular importance since most of them are endemic species not only **for**  
482 Ecuador, but also **for** specific habitats [15].

#### 484 **Major Threats**

485 We have generated a quantitative and objective ranking of threats for Ecuadorian  
486 amphibians, using clear and comprehensive rules [59]. A ranking of threats helps  
487 to identify and prioritize the conservation actions needed to mitigate them and  
488 **allows** results that are comparable and replicable [72]. Agriculture is of particular  
489 importance amongst the threats **experimented** by Ecuadorian amphibians. In  
490 Ecuador, the unsustainable use of forested lands and agriculture-related  
491 deforestation, even in areas where human population is low, are important threats  
492 making a priority the need for better strategies to improve the rural population  
493 management practices. Also, some anthropogenic threats (roads, human  
494 settlements, and oil activities) amplify the incidence of other pressures and, as  
495 shown in previous studies, are the most relevant predictors of ecological integrity  
496 [1,36,73].

497 The ecological characteristics and microhabitat preferences of the species can  
498 lead to deep variations in the susceptibility to certain drivers of extinction

499 amongst taxa [2]. In amphibians, species respond differently to disturbance [74],  
500 therefore a distinction should be made, and conservation measures to be adopted  
501 must be different along environmental gradients [75]. For example, we found a  
502 different distribution pattern in the case of threatened species, as well as **endemic**  
503 ones, both showing a higher density along an altitudinal gradient, with a peak  
504 toward montane forests and highlands (Fig 7). However, cases of amphibian  
505 species interaction with spatial patterns of human impacts are puzzling. An  
506 alarming trend is that the greatest **density of endangered taxa occurs in montane**  
507 **and paramo ecosystems**, regions that we would expect to be under a lesser  
508 anthropic impact. Further considerations on climate change and synergic effects  
509 with habitat loss and emergent diseases, like Chytridiomycosis, must be  
510 considered as major threats to Ecuadorian amphibians [11,69], especially to  
511 **endemic** species.

512

513 Future assessment efforts should include the presence of invasive species as  
514 another potential threat to Ecuadorian amphibians. Currently, there are few  
515 studies focused on determining the expansion of these species and their effect  
516 on native amphibian populations. The bullfrog (*R. catesbeiana*) has been  
517 reported in six Ecuadorian provinces [76]; **rainbow** trout (*Oncorhynchus mykiss*)  
518 and **common trout** (*Salmo trutta*) are present in Andean areas of the whole  
519 Ecuadorian highlands [77]. The threat that these species represent to amphibians  
520 could be significant, considering their predatory and expansionist biology, but  
521 also because it generally overlaps with other threats that affect the habitat of  
522 species listed at extinction risk. A special case is represented by the Galápagos  
523 Islands, which do not have any native amphibian species, but scattered records



524 of established tree-frog populations (*Scinax quinquemaculatus*) are reported in  
525 Santa Cruz and Isabela islands [15,78]. The effects of this species on the local  
526 ecosystems should be monitored in the future.

527

### 528 ***Protected areas and threatened species***

529 An evaluation of existing protected areas overlapped with the endangered  
530 species distribution reveals that much work is still needed to ensure the long-term  
531 survival of amphibians. Since the existence of protected areas is considered the  
532 main hope for preserving threatened species from extinction [79], the fact that  
533 10% (65 species) of the Ecuadorian threatened amphibian species occur  
534 uniquely outside protected areas is preoccupying and highlights the limitations of  
535 the current National Protected Areas Network.

536 Our study emphasizes several areas of that are home of a high number of  
537 threatened amphibian species and that are not protected (Fig 10). This is  
538 especially evident in three locations: the Chocó area (north of the "Los Ilinizas"  
539 ecological reserve and the Pichincha volcano), the area among Cayambe-Coca,  
540 Antisana, and Sumaco, and in the southern part of the country (south of Sangay  
541 National Park). By including these areas with high amphibian species diversity  
542 (Figs. 4, 6 and 10) in the national protected area network would maximize  
543 ecological representativeness and threatened species' coverage [80].

544 The dataset of distribution records reveals an important sampling effort bias,  
545 mostly related to roads or accessible areas (Fig 1). Large areas have been under-  
546 sampled, especially coastal areas, Andean paramo, and Amazonia. As a result,  
547 species categorized as DD are mostly located in the Amazon Region and on the  
548 eastern slopes of the Andes (Fig 8). In many cases, the remoteness of the areas

549 prevents access due to logistical difficulties [80]. Although for the same reasons,  
550 the anthropic impact should be lower, in the case of high-altitude Andean  
551 habitats, we notice an overlapped high density of threatened species (especially  
552 CR), emphasizing the importance of focused searches for healthy populations in  
553 these secluded regions.

554 In the case of coastal areas, the **shortage of inventories is not caused by limited**  
555 **access, severe habitat loss**, but rather **of insufficient sampling**. Although a lower  
556 amphibian diversity is likely, mainly because of extreme climatic factors that  
557 restrict the distribution to a low number of resilient species, the total absence of  
558 records over large areas suggests a **sampling bias** [80]. However, the revision of  
559 threats indicates that the coastal region has a high proportion of its surface  
560 included under the **highest risk**, as well as a low representation in the Protected  
561 Areas Network (Fig 4). We emphasize the need for urgent base-line information  
562 regarding the amphibians inhabiting this region, as the lack of data makes it  
563 impossible to detect and monitor potential population declines or local extinctions.

564

565 ***Towards a robust and objective methodology to evaluate species***  
566 ***conservation status***

567 **The methodology** implemented herein is explicit, objective, and consistent, which  
568 are the main requisites to produce a solid assessment of species conservation  
569 categories. We are confident that we have produced standardized parameters to  
570 estimate robust risk variables that integrate interacting threats [2,59]. We  
571 consider it as a key step of improving the protocol for **Red List assessment** in the  
572 effort to validate the taxonomic and spatial database. Ecological modeling was  
573 performed using all **available data points** for nominal species, and as such

574 included historical records, identifying and avoiding species complexes, and  
575 candidate new species based on phylogenetic evidence [36,37,40,42,81-84].  
576 Although experts participated in the evaluation of the current status it is possible  
577 that the risk of extinction of some species is higher than assessed, due to the  
578 decline in their distribution range over time, as well as limitations on our  
579 understanding of population dynamics and ecological interactions [11,85].  
580 Demographic information is lacking for the vast majority of Ecuadorian  
581 amphibians (Fig 2b). This constitutes a serious obstacle for obtaining a more  
582 comprehensive evaluation of their conservation status, preventing the early  
583 detection of declines. It is a particular case for Ecuador, where an important  
584 number of species are known only from a small number of specimens, and some  
585 have not been encountered for decades [e.g. 25]. This can be the result of cryptic  
586 habits that characterize some taxa (e.g. cecilians), but might as well indicate  
587 severe population declines or even extinctions (*Telmatobius*, *Atelopus*, or some  
588 centrolenids). This emphasizes the need for an intensive effort to gather base-  
589 line information on abundance and community composition for a diversity of  
590 amphibian populations.

591 Additionally, incomplete taxonomic delimitation has the potential to seriously  
592 impact amphibian conservation [71,86]. In widely distributed species complexes,  
593 which are often assessed as LC, sometimes underlie cryptic taxa [37,42,83,87],  
594 which might be facing particular conservation threats. We highlight the  
595 importance of taxonomy as a cornerstone for extinction risk assessments and  
596 conservation, especially in tropical mega-diverse regions. Assessments based  
597 on non-nominal species-level lineages or ambiguous names must be prioritized  
598 for taxonomic research [88].

## 599 **Conclusions**

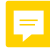

600 We offer the **Red List Assessment for amphibian species in Ecuador**, as one of   
601 the most detailed and complete taxonomic coverage for any Ecuadorian  
602 taxonomic group to date. Our evaluation assessed that 57% of species **qualified**   
603 **as Threatened**, 12% as Near Threatened, and 4% as Data Deficient. This   
604 assessment **surprisingly** almost doubled the number of species considered as   
605 threatened compared to the previous evaluation in 2011 [28]. Most threatened  
606 species are widely distributed towards montane forest and paramo in the Andes,  
607 with nearly 10% of them found to occur only outside protected areas. To  
608 complement the results of this work and other future works, there is an urgent  
609 need for increasing the number of integrative taxonomic studies to describe new  
610 species and generate data on the ecology and genetics of populations and  
611 communities for those considered as taxonomic complexes. It is essential to  
612 focus research efforts on species categorized as DD, that may be in danger of  
613 extinction [30,89]. Such integration will help in better management and  
614 conservation of amphibian species in hot-spot countries, like Ecuador.

615

## 616 **Acknowledges**

617 We thank to Pablo Larco, Patricia Pachacama and Paola Guijarro (PARG  
618 Project), for their valuable support along the red list assessment; to Andrea  
619 Coloma, Eduardo Toral, Stephanie Arellano, Ernesto Arbeláez, Diego Inclán and  
620 Grace C. Reyes Ortega, for sharing information and technical comments along  
621 the workshops and database curation.

622

623

624 **Financial disclosure**

625 This work was supported by the project “Conservation of Ecuadorian Amphibians  
626 and access to genetic resources-PARG”; projects “On the quest of the golden  
627 fleece in Amazonia: The first herpetological DNA - barcoding expedition to  
628 unexplored areas on the Napo watershed, Ecuador”, funded by the Secretaría  
629 Nacional de Ciencia y Tecnología del Ecuador (Senescyt-ENSAMBLE Grant  
630 #PIC-17-BENS-001) and The World Academy of Sciences (TWAS Grant #16-  
631 095) granted to HMOA; and the project Critical Ecosystem Partnership Fund  
632 (CEPF) grant CEPF-108984 “Amphibian Conservation in the Abra de Zamora  
633 Key Biodiversity Area of Ecuador” granted to DAO, PS and DS.

634

635 **References**

- 636 1. Betts J, Young RP, Hilton-Taylor C, Hoffmann M, Rodríguez JP, et al. (2020) A  
637 framework for evaluating the impact of the IUCN Red List of threatened species.  
638 Conservation Biology 34: 632-643.
- 639 2. Collen B, Dulvy NK, Gaston KJ, Gärdenfors U, Keith DA, et al. (2016) Clarifying  
640 misconceptions of extinction risk assessment with the IUCN Red List. Biology  
641 Letters 12: 20150843.
- 642 3. IUCN (2017) Guidelines for Using the IUCN Red List Categories and Criteria. Version  
643 13 Prepared by the Standards and Petitions Subcommittee of the International  
644 Union for the Conservation of Nature.
- 645 4. IUCN (2020) The IUCN Red List of Threatened Species.  
- 646 5. Vasconcelos TS, da Silva FR, dos Santos TG, Prado VH, Provete DB (2019)  
647 Biogeographic Patterns of South American Anurans. Switzerland: Springer  
648 International Publishing. 149 p.
- 649 6. Vitt LJ, Caldwell JP (2014) Herpetology: An introductory biology of amphibians and  
650 reptiles. London: Academic Press. 757 p.
- 651 7. Hof C, Araújo MB, Jetz W, Rahbek C (2011) Additive threats from pathogens, climate  
652 and land-use change for global amphibian diversity. Nature 480: 516-519.

- 653 8. McCain CM, Colwell RK (2011) Assessing the threat to montane biodiversity from  
654 discordant shifts in temperature and precipitation in a changing climate. *Ecology*  
655 *Letters* 14: 1236-1245.
- 656 9. Scheele BC, Pasmans F, Skerratt LF, Berger L, Martel A, et al. (2019) Amphibian  
657 fungal panzootic causes catastrophic and ongoing loss of biodiversity. *Science*  
658 363: 1459-1463.
- 659 10. Ceballos G, Ehrlich P, Dirzo R (2017) Biological Annihilation via the Ongoing Sixth  
660 Mass Extinction Signaled by Vertebrate Population Losses and Declines. *PNAS*  
661 114: E6089-E6096.
- 662 11. Menéndez-Guerrero PA, Davies TJ, Green DM (2020) Extinctions of Threatened  
663 Frogs may Impact Ecosystems in a Global Hotspot of Anuran Diversity. *Herpetologica* 76: 121-131.
- 664
- 665 12. Reider K (2018) Survival at the Summits: Amphibian Responses to Thermal  
666 Extremes, Disease, and Rapid Climate Change in the High Tropical Andes:  
667 [digitalcommons.fiu.edu](https://digitalcommons.fiu.edu).
- 668 13. AmphibiaWeb (2020) AmphibiaWeb: Information on amphibian biology and  
669 conservation. 2020 ed: Berkeley, California.
- 670 14. Centro-Jambatu (2020) Anfíbios de Ecuador. Fundación Otonga, Quito, Ecuador.
- 671 15. Ron SR, A. M-V, A. OD (2020) Anfíbios del Ecuador. Version 2019.0. Quito, Ecuador:  
672 Museo de Zoología, Pontificia Universidad Católica del Ecuador.
- 673 16. Frost DR (2020) Amphibian Species of the World: an Online Reference. 6.1 ed. New  
674 York, USA: American Museum of Natural History.
- 675 17. Mayani-Parás F, Botello F, Castañeda S, Sánchez-Cordero V (2019) Impact of  
676 Habitat Loss and Mining on the Distribution of Endemic Species of Amphibians  
677 and Reptiles in Mexico. *Diversity* 11: 1-11.
- 678 18. Botello F, Sarkar S, Sánchez-Cordero V (2015) Impact of habitat loss on distributions  
679 of terrestrial vertebrates in a high-biodiversity region in Mexico. *Biological*  
680 *Conservation* 184: 59-65.
- 681 19. Cisneros-Heredia DF (2008) Habitat loss and climate change impacts on Neotropical  
682 anurans: Implications for in-situ conservation. A case study with Glassfrogs from  
683 eastern Ecuador (Amphibia: Anura: Centrolenidae). London: M.Sc. Dissertation.  
684 King's College. 73 p.
- 685 20. Lessmann J, Muñoz J, Bonaccorso E (2014) Maximizing species conservation in  
686 continental Ecuador: a case of systematic conservation planning for biodiverse  
687 regions. *Ecology and Evolution* 2014: 1-13.

- 688 21. Tapia-Armijos MF, Homeier J, Espinosa CI, Leuschner C, Cruz Mdl (2015)  
689 Deforestation and Forest Fragmentation in South Ecuador since the 1970s –  
690 Losing a Hotspot of Biodiversity. PLOS ONE 10: e0133701.
- 691 22. Gomes VHF, Vieira ICG, Salomão RP, ter Steege H (2019) Amazonian tree species  
692 threatened by deforestation and climate change. Nature Climate Change 9: 547-  
693 553.
- 694 23. Bustamante MR, Ron SR, Coloma LA (2005) Cambios en la Diversidad en Siete  
695 Comunidades de Anuros en los Andes de Ecuador. Biotropica 37: 180–189.
- 696 24. La Marca E, Lips K, Lötters S, Puschendorf R, Ibáñez R, et al. (2006) Catastrophic  
697 Population Declines and Extinctions in Neotropical Harlequin Frogs (Bufonidae:  
698 *Atelopus*). Biotropica 37: 190–201.
- 699 25. Coloma LA, Duellman WE, Almendariz A, Ron S, Terán-Valdez A, et al. (2010) Five  
700 new (extinct?) species of *Atelopus* (Anura: Bufonidae) from Andean Colombia,  
701 Ecuador, and Peru. Zootaxa 2574: 1-54.
- 702 26. IUCN (2008) The IUCN Amphibians Initiative: A record of the 2001-2008 assessment  
703 efforts for the IUCN Red List.
- 704 27. Wake DB, Vredenburg VT (2008) Are we in the midst of the sixth mass extinction? A  
705 view from the world of amphibians. Proceedings of the National Academy of  
706 Sciences 105: 11466-11473.
- 707 28. Ron SR, Guayasamin JM, Menéndez-Guerrero P (2011) Biodiversity and  
708 conservation status of Ecuadorian Amphibians. In: Heatwole H, L. B-AC,  
709 Wilkinson HW, editors. Amphibian Biology Part 2. Baulkham Hills, Australia:  
710 Surrey Beatty & Soons PTY Limited. pp. 129-170.
- 711 29. González-del-Piiego P, Freckleton RP, Edwards DP, Koo MS, Scheffers BR, et al.  
712 (2019) Phylogenetic and Trait-Based Prediction of Extinction Risk for Data-  
713 Deficient Amphibians. Current Biology 29: 1557-1563.e1553.
- 714 30. Howard SD, Bickford DP (2014) Amphibians over the edge: Silent extinction risk of  
715 Data Deficient species. Diversity and Distributions 20: 837-846.
- 716 31. Grant T, Rada M, Anganoy-Criollo M, Batista A, Dias PH, et al. (2017) Phylogenetic  
717 Systematics of Dart-Poison Frogs and Their Relatives Revisited (Anura:  
718 Dendrobatoidea). South American Journal of Herpetology 12.
- 719 32. Guayasamin JM, Castroviejo-Fisher S, Trueb L, Ayarzagüena J, Rada M, et al.  
720 (2009) Phylogenetic systematics of Glassfrogs (Amphibia: Centrolenidae) and  
721 their sister taxon *Allophryne ruthveni*. Zootaxa 2100: 1-97.
- 722 33. Castroviejo-Fisher S, DE LA RIVA I, POMBAL JR JP, da Silva HR, Rojas-Runjaic  
723 FJ, et al. (2015) Phylogenetic systematics of egg-brooding frogs (Anura:  
724 Hemiphractidae) and the evolution of direct development. Zootaxa 4004: 1-75.

- 725 34. Hedges SB, Duellman WE, Heinicke MP (2008) New World direct-developing frogs  
726 (Anura: Terrarana): Molecular phylogeny, classification, biogeography, and  
727 conservation. *Zootaxa* 2008: 1–182.
- 728 35. Sánchez-Nivicela JC, Peloso PLV, Urgiles VL, Yáñez-Muñoz MH, Sagredo Y, et al.  
729 (2020) Description and phylogenetic relationships of a new trans-Andean species  
730 of *Elachistocleis* Parker 1927 (Amphibia, Anura, Microhylidae). *Zootaxa* 4779:  
731 18.
- 732 36. Guayasamin J, Cisneros-Heredia D, McDiarmid R, Peña P, Hutter C (2020)  
733 Glassfrogs of Ecuador: Diversity, Evolution, and Conservation. *Diversity* 12: 1-  
734 222.
- 735 37. Páez NB, Ron SR (2019) Systematics of *Huicundomantis*, a new subgenus of  
736 *Pristimantis* (Anura, Strabomantidae) with extraordinary cryptic diversity and  
737 eleven new species. *ZooKeys* 868: 1-112.
- 738 38. Urgiles VL, Székely P, Székely D, Christodoulides N, Sanchez-Nivicela JC, et al.  
739 (2019) Genetic delimitation of *Pristimantis orestes* (Lynch, 1979) and *P.*  
740 *saturninoi* Brito et al., 2017 and description of two new terrestrial frogs from the  
741 *Pristimantis orestes* species group (Anura, Strabomantidae). *ZooKeys* 864: 111-  
742 146.
- 743 39. Reyes-Puig C, Pablo Reyes-Puig J, A Velarde-Garcéz D, Nicolás D, Mancero E, et  
744 al. (2019) A new species of terrestrial frog *Pristimantis* (Strabomantidae) from the  
745 upper basin of the Pastaza River, Ecuador. *ZooKeys* 832: 113-133.
- 746 40. Carvajal-Endara S, Coloma LA, Morales-Mite MA, Guayasamin JM, Szekely P, et al.  
747 (2019) Phylogenetic systematics, ecology, and conservation of marsupial frogs  
748 (Anura: Hemiphractidae) from the Andes of southern Ecuador, with descriptions  
749 of four new biphasic species. *Zootaxa* 4562: 1-102.
- 750 41. Navarrete MJ, Venegas PJ, Ron SR (2016) Two new species of frogs of the genus  
751 *Pristimantis* from Llanganates National Park in Ecuador with comments on the  
752 regional diversity of Ecuadorian *Pristimantis* (Anura, Craugastoridae). *Zookeys*  
753 10.3897/zookeys.593.8063: 139-162.
- 754 42. Ortega-Andrade HM, Rojas-Soto OR, Valencia JH, Espinosa de los Monteros A,  
755 Morrone JJ, et al. (2015) Insights from integrative systematics reveal cryptic  
756 diversity in *Pristimantis* Frogs (Anura: Craugastoridae) from the upper Amazon  
757 basin. *PLoS One* 10: e0143392.
- 758 43. Reyes-Puig C, Yáñez Muñoz M, Ortega J, Ron S (2020) Relaciones filogenéticas del  
759 subgénero *Hypodictyon* (Anura: Strabomantidae: *Pristimantis*) con la descripción  
760 de tres especies nuevas de la región del Chocó. *Revista Mexicana de*  
761 *Biodiversidad* 91: 1-38.



- 762 44. Chapman AD (2005) Principles of Data Quality. Version 1.0. Copenhagen: Report  
763 for the Global Biodiversity Information Facility.
- 764 45. Barve N, Barve V, Jiménez-Valverde A, Lira-Noriega A, Maher SP, et al. (2011) The  
765 crucial role of the accessible area in ecological niche modeling and species  
766 distribution modeling. *Ecological Modelling* 222: 1810-1819.
- 767 46. Bedía J, Herrera S, Gutiérrez JM (2013) Dangers of using global bioclimatic datasets  
768 for ecological niche modeling. Limitations for future climate projections. *Global  
769 and Planetary Change* 107: 1-12.
- 770 47. Peterson AT, Soberón J (2012) Species distribution modeling and ecological niche  
771 modeling: getting the concepts right. *Natureza & Conservação* 10: 102-107.
- 772 48. Broennimann O, Fitzpatrick MC, Pearman PB, Petitpierre B, Pellissier L, et al. (2012)  
773 Measuring ecological niche overlap from occurrence and spatial environmental  
774 data. *Global Ecology and Biogeography* 21: 481-497.
- 775 49. Pearman PB, Guisan A, Broennimann O, Randin CF (2008) Niche dynamics in space  
776 and time. *Trends in Ecology and Evolution* 23: 149-158.
- 777 50. Fick SE, Hijmans RJ (2017) WorldClim 2: new 1-km spatial resolution climate  
778 surfaces for global land areas. *International Journal of Climatology* 37: 1-14.
- 779 51. Escobar LE, Lira-Noriega A, Medina-Vogel G, Townsend Peterson A (2014) Potential  
780 for spread of the white-nose fungus (*Pseudogymnoascus destructans*) in the  
781 Americas: use of Maxent and NicheA to assure strict model transference.  
782 *Geospatial Health* 9: 221-229.
- 783 52. Riahi K, Rao S, Krey V, Cho C, Chirkov V, et al. (2011) RCP 8.5—A scenario of  
784 comparatively high greenhouse gas emissions. *Climatic Change* 109: 33-57.
- 785 53. Elith J, Phillips SJ, Hastie T, Dudík M, Chee YE, et al. (2011) A statistical explanation  
786 of MaxEnt for ecologists. *Diversity and Distributions* 17: 43–57.
- 787 54. Cobos ME, Peterson AT, Barve N, Osorio-Olvera L (2019) kuenm: an R package for  
788 detailed development of ecological niche models using Maxent. *PeerJ* 7: e6281.
- 789 55. Qiao H, Escobar LE, Peterson AT (2017) Accessible areas in ecological niche  
790 comparisons of invasive species: Recognized but still overlooked. *Scientific  
791 reports* 7: 1213.
- 792 56. Morrone JJ (2014) Biogeographical regionalisation of the Neotropical region.  
793 *Zootaxa* 3782: 1–110.
- 794 57. IUCN (2019) Guidelines for Using the IUCN Red List Categories and Criteria. Version  
795 14. Standards and Petitions Subcommittee of the International Union for the  
796 Conservation of Nature.
- 797 58. Tennekes M (2018) tmap: Thematic Maps in R. *Journal of Statistical Software* 84: 1-  
798 39.

- 799 59. Salafsky N, Salzer D, Stattersfield AJ, Hilton-Taylor C, Neugarten R, et al. (2008) A  
800 Standard Lexicon for Biodiversity Conservation: Unified Classifications of Threats  
801 and Actions. *Conservation Biology* 22: 897-911.
- 802 60. Pauli H, Gottfried M, Reiter K, Klettner C, Grabherr G (2007) Signals of range  
803 expansions and contractions of vascular plants in the high Alps: observations  
804 (1994-2004) at the GLORIA master site Schrankogel, Tyrol, Austria. *Global  
805 Change Biology* 13: 147-156.
- 806 61. Warren DL, Seifert SN (2011) Ecological niche modeling in Maxent: the importance  
807 of model complexity and the performance of model selection criteria. *Ecological  
808 Applications* 21: 335-342.
- 809 62. MAE (2013) Sistema de Clasificación de los Ecosistemas del Ecuador Continental.  
810 Quito, Ecuador: Ministerio del Ambiente del Ecuador, Subsecretaría de  
811 Patrimonio Natural. 232 p.
- 812 63. MAE (2020) Mapa Interactivo del Ministerio del Ambiente. Quito: Ministerio del  
813 Ambiente y Agua del Ecuador.
- 814 64. IGM (2002) Cartas topográficas del Ecuador 1: 250 000. 1.0 ed. Quito, Ecuador: Instituto  
815 Geográfico Militar.
- 816 65. Armenteras D, Espelta J, Rodríguez N, Retana J (2017) Deforestation dynamics and  
817 drivers in different forest types in Latin America: Three decades of studies (1980–  
818 2010). *Global Environmental Change* 46: 139-147.
- 819 66. Roy BA, Zorrilla M, Endara L, Thomas DC, Vandegrift R, et al. (2018) New Mining  
820 Concessions Could Severely Decrease Biodiversity and Ecosystem Services in  
821 Ecuador. *Tropical Conservation Science* 11: -20.
- 822 67. INEC (2010) Census Data Base of 2010.
- 823 68. Bässler C, Müller J, Hothorn T, Kneib T, Badeck F, et al. (2010) Estimation of the  
824 extinction risk for high-montane species as a consequence of global warming and  
825 assessment of their suitability as cross-taxon indicators. *Ecological indicators* 10:  
826 341-352.
- 827 69. Menéndez-Guerrero PA, Graham CH (2013) Evaluating multiple causes of  
828 amphibian declines of Ecuador using geographical quantitative analyses.  
829 *Ecography* 36: 1-14.
- 830 70. Mooers AO, Faith DP, Maddison WP (2008) Converting endangered species  
831 categories to probabilities of extinction for phylogenetic conservation  
832 prioritization. *PLoS One* 3: 1-5.
- 833 71. Guillory W, Muell M, Summers K, Brown J (2019) Phylogenomic Reconstruction of  
834 the Neotropical Poison Frogs (Dendrobatidae) and Their Conservation. *Diversity*  
835 11: 126.

- 836 72. IUCN (2012) Guidelines for application of IUCN Red List Criteria at regional and  
837 national levels. Gland, Switzerland and Cambridge: Version 4.0. IUCN Species  
838 Survival Commission. 41 p.
- 839 73. Lessmann J, Fajardo J, Bonaccorso E, Bruner A (2019) Cost-effective protection of  
840 biodiversity in the western Amazon. *Biological Conservation* 235: 250-259.
- 841 74. Pearman PB (1997) Correlates of amphibian diversity in an altered landscape of  
842 Amazonian Ecuador. *Conservation Biology* 11: 1211-1225.
- 843 75. Harcourt AH, Parks SA (2003) Threatened primates experience high human  
844 densities: adding an index of threat to the IUCN Red List criteria. *Biological*  
845 *Conservation* 109: 137-149.
- 846 76. Cruz-Cordovez C, Herrera I, Espinoza F, Rizzo K, ... (2020) New record of a feral  
847 population of *Lithobates catesbeianus* Shaw, 1802 in a protected area (Santay  
848 Island) in the Ecuadorian coast: reabic.net.
- 849 77. Crespo V (2015) ¡Alerta con las especies exóticas invasoras de agua dulce! Nuestra  
850 *Ciencia* 17: 12-16.
- 851 78. Lever C (2003) *Naturalized Reptiles and Amphibians of the World*. New York, USA:  
852 Oxford University Press. 344 p.
- 853 79. Kearney S, Adams V, Fuller R, Possingham H, Watson J (2020) Estimating the  
854 benefit of well-managed protected areas for threatened species conservation.  
855 *Oryx* 54: 276–284.
- 856 80. Monsarrat S, Boshoff AF, Kerley GIH (2019) Accessibility maps as a tool to predict  
857 sampling bias in historical biodiversity occurrence records. *Ecography* 42: 125-  
858 136.
- 859 81. Páez-Vacas MI, Coloma LA, Santos JC (2010) Systematics of the *Hyloxalus bocagei*  
860 complex (Anura: Dendrobatidae), description of two new cryptic species, and  
861 recognition of *H. maculosus*. *Zootaxa* 2711: 1-75.
- 862 82. Caminer M, Ron S (2014) Systematics of treefrogs of the *Hypsiboas calcaratus* and  
863 *Hypsiboas fasciatus* species complex (Anura, Hylidae) with the description of four  
864 new species. *ZooKeys* 370: 1-68.
- 865 83. Arteaga A, Pyron RA, Peñafiel N, Romero-Barreto P, Culebras J, et al. (2016)  
866 Comparative Phylogeography Reveals Cryptic Diversity and Repeated Patterns  
867 of Cladogenesis for Amphibians and Reptiles in Northwestern Ecuador. *PLoS*  
868 *ONE* 11: e0151746.
- 869 84. Chasiluisa VD, Caminer MA, Varela-Jaramillo A, Ron SR (2020) Description and  
870 phylogenetic relationships of a new species of treefrog of the *Osteocephalus*  
871 *buckleyi* species group (Anura: Hylidae). *Neotropical Biodiversity* 6: 21-36.

- 872 85. Zipkin EF, DiRenzo GV, Ray JM, Rossman S, Lips KR (2020) Tropical snake diversity  
873 collapses after widespread amphibian loss. *Science* 367: 814-816.
- 874 86. Angulo A, Icochea J (2010) Cryptic species complexes, widespread species and  
875 conservation: lessons from Amazonian frogs of the *Leptodactylus marmoratus*  
876 group (Anura: Leptodactylidae). *Systematics and Biodiversity* 8: 357-370.
- 877 87. Ortega Andrade HM, Rojas-Soto OR, Espinosa de los Monteros A, Valencia J, Read  
878 M, et al. (2017) Revalidation of *Pristimantis brevicrus* (Anura, Terrarana) with  
879 comments on cryptic diversity in a widespread Amazonian direct-developing frog.  
880 *The Herpetological Journal* 26: 87-103.
- 881 88. Scherz MD, Glaw F, Hutter CR, Bletz MC, Rakotoarison A, et al. (2019) Species  
882 complexes and the importance of Data Deficient classification in Red List  
883 assessments: The case of *Hylobatrachus* frogs. *PloS one* 14: 1-32.
- 884 89. Nori J, Loyola R (2015) On the Worrying Fate of Data Deficient Amphibians. *PLOS*  
885 *ONE* 10: e0125055.
- 886
- 887
- 888
- 889

890 **Figures** 

891 **Figure 1.** Spatial distribution of 37,328 records from 635 species (plus *Rana*   
892 *catesbeiana*, as invasive species) assessed for the IUCN Red List of Ecuadorian  
893 amphibians. Details of collections, sources, and databases are provided in S2 Table.

894

895 **Figure 2.** IUCN Red List of amphibians from Ecuador. The number of species by (a)   
896 Categories and (b) Criteria. Categories: CR = Critically Endangered, EN = Endangered,   
897 VU = Vulnerable, NT = Near Threatened, LC = Least Concern, DD = Data Deficient, NE  
898 = Not Evaluated - corresponds to *Rana catesbeiana*, an invasive species in Ecuador.  
899 *Atelopus ignescens* (Critically Endangered) was believed to be extinct until its  
900 rediscovery in 2016. Illustration by PARG.

901

902 **Figure 3.** A taxonomic perspective of the Red List status of amphibians in Ecuador. The   
903 species composition (% of threatened species) of each family in Anura (dark blue),  
904 Caudata (bright blue) and Gymnophiona (purple) is characterized by ribbons connected  
905 to the current Red List status for each species. The numerical values below each country   
906 name depict the relative percentage with the associated Red List category: CR =  
907 Critically Endangered, EN = Endangered, VU = Vulnerable, NT = Near Threatened, LC  
908 = Least Concern, and DD = Data Deficient. Two endemic and threatened frogs are  
909 illustrated for *Atelopus coynei* (Critically endangered) distributed in northern Andes of   
910 Ecuador, whereas *Excidobates condor* (Endangered) is distributed in the Cordillera del  
911 Condor, southeastern Ecuador. Both species are threatened by habitat loss, mining and  
912 climate change. Illustrations by PARG.

913

914 **Figure 4.** High resolution (30 m x 30 m) Environmental Risk Surface (ERS) model for  
915 Ecuadorian amphibians. Values of the ERS range from 0 (Green, low) to 1 (Red, high)  
916 to represent threat intensity. Shaded areas correspond to the National System of   
917 Protected areas shown in Fig 1.

918 **Figure 5.** Major threats associated with amphibian taxa (% of locality records in  
919 database) by conservation categories in Ecuador. Environmental contractions on climate  
920 change scenarios for RPC4.5 and RPC 8.5 are shown for those species with more than  
921 50% of shift.

922

923 **Figure 6.** Cumulative species richness for threatened taxa ( $n = 265$  models) by Red List  
924 category. Maps with cumulative species (Num sp) models per category and family are  
925 shown in S3-5 Figures.

926

927 **Figure 7.** Occurrence data of threatened Ecuadorian amphibians by (a) taxonomic  
928 families, (b) endemic taxa, and (c) Red List categories in an altitudinal gradient. Risk  
929 categories: CR = Critically Endangered, EN = Endangered, VU = Vulnerable, NT = Near  
930 Threatened, DD = Data Deficient. Least Concern taxa have been removed.

931

932 **Figure 8.** Occurrence data of NT (green), DD (grey), and NE (blue) Ecuadorian  
933 amphibian species, by Red List category and family. Only families with species in these  
934 categories are shown. *Boana picturata* (NT) is an inhabitant of the Chocoan region in  
935 northwestern Ecuador, threatened by habitat loss and fragmentation.

936

937 **Figure 9.** Frequency of locality records of amphibians in each risk category by Natural  
938 Regions in Ecuador. Categories: CR = Critically Endangered, EN = Endangered, VU =  
939 Vulnerable, NT = Near Threatened, DD = Data Deficient. Least Concern taxa have been  
940 removed from this figure.

941

942 **Figure 10.** The IUCN Red List of amphibians from Ecuador representation in the National  
943 System of Protected Areas. Categories: CR = Critically Endangered, EN = Endangered,  
944 VU = Vulnerable, NT = Near Threatened, LC = Least Concern, DD = Data Deficient.  
945 SNAP – Governmental National System of Protected Areas, from the Spanish acronym.

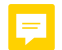

946 **Tables** 

947 **Table 1.** Major threats with their subcategories, influence distance, decay function, and Analytic  
 948 Hierarchy Process (AHP) intensity value estimated for modeling threats to Ecuadorian  
 949 amphibians.

| Major threats and categories                     | Influence Distance (m) | Decay function | AHP Intensity |
|--------------------------------------------------|------------------------|----------------|---------------|
| <b>Agriculture and aquaculture</b>               |                        |                |               |
| Crops                                            |                        |                |               |
| Permanent crops                                  | 1875                   | Logistic       | 0.015         |
| Annual crops                                     | 1250                   |                | 0.023         |
| Semi-permanent crops                             | 375                    |                | 0.016         |
| Grassland                                        | 375                    |                | 0.036         |
| Agricultural mosaic                              | 375                    |                | 0.003         |
| Forest plantations                               | 250                    |                | 0.007         |
| Other agricultural lands                         | 125                    |                | 0.005         |
| Aquaculture                                      |                        |                |               |
| Shrimp farm area                                 | 1250                   | MSSmall        | 0.051         |
| <b>Biological resource use</b>                   |                        |                |               |
| Deforestation                                    | 125                    | Logistic       | 0.34          |
| <b>Emerging diseases and Invasive species</b>    |                        |                |               |
| Fungus <i>Chytridium</i>                         | 1250                   | Constant       | 0.035         |
| <i>Rana catesbeiana</i> (Bullfrog)               | 1250                   | Constant       | 0.012         |
| <b>Energy production and mining</b>              |                        |                |               |
| Operations                                       | 1250                   | MSSmall        | 0.026         |
| Explorations                                     | 1000                   |                | 0.005         |
| Mining and quarrying                             |                        |                |               |
| Concessions                                      | 625                    |                | 0.002         |
| Construction Materials/Free use/Artisanal mining | 250                    |                | 0.007         |
| Oil drilling                                     |                        |                |               |
| Active oil fields                                | 1250                   | Logistic       | 0.015         |
| Oil wells                                        | 625                    |                | 0.021         |
| Dormant oil fields                               | 250                    |                | 0.004         |
| Oil blocks                                       | 250                    |                | 0.003         |
| Hydroelectric power plants                       |                        |                |               |
| operative                                        | 1250                   | MSSmall        | 0.009         |
| Building                                         | 625                    |                | 0.012         |
| In project                                       | 250                    |                | 0.001         |
| <b>Natural system modifications</b>              |                        |                |               |
| Megaprojects area of influence                   | 1250                   | MSSmall        | 0.033         |
| <b>Population density</b>                        |                        |                |               |
| Population density                               | Continuous raster      | Continuous     | 0.22          |
| <b>Transportation</b>                            |                        |                |               |
| 1st order                                        | 1250                   | Lineal         | 0.025         |
| 2nd order                                        | 1000                   |                | 0.016         |
| 3rd order                                        | 625                    |                | 0.011         |
| Roads                                            |                        |                |               |
| Trails                                           | 250                    |                | 0.008         |
| Airports                                         |                        |                |               |
| Airports                                         | 1250                   | Logistic       | 0.006         |
| Airport runways                                  | 625                    |                | 0.003         |
| Oil pipeline/Polyduct                            | 625                    | Logistic       | 0.002         |
| Pipelines                                        |                        |                |               |
| Gas pipeline                                     | 250                    |                | 0.002         |
| <b>Stochastic events</b>                         |                        |                |               |
| Flood-prone areas                                | 625                    | MSSmall        | 0.005         |
| Volcanism area of influence                      | 12500                  | MSSSmall       | 0.016         |

950

951

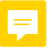

952 **Table 2. Species and records by conservation categories in a database for Red List Assessment.**

953 CR = Critically Endangered, EN = Endangered, VU = Vulnerable, NT = Near Threatened, LC =

954 Least Concern, DD = Data Deficient, NE = No Evaluated, corresponds to *Rana catesbeiana*, an

955 invasive species in Ecuador.

956

| Collections Databases                                     | CR              | EN                | VU                | NT               | LC                | DD               | NE*           | Species (%) | Records (%)  |
|-----------------------------------------------------------|-----------------|-------------------|-------------------|------------------|-------------------|------------------|---------------|-------------|--------------|
| Global Biodiversity Information Facility                  | 70 (702)        | 107 (715)         | 98 (1320)         | 64 (1201)        | 162 (11313)       | 19 (122)         | 1 (3)         | 521 (82%)   | 15376 (41%)  |
| BIOWEB-PUCE                                               | 47 (239)        | 114 (1216)        | 101 (1889)        | 68 (2065)        | 168 (10161)       | 10 (211)         | 1 (2)         | 509 (80%)   | 15783 (42%)  |
| Instituto Nacional de Biodiversidad                       | 18 (29)         | 81 (238)          | 91 (314)          | 59 (321)         | 152 (1883)        | 6 (31)           |               | 407 (64%)   | 2816 (8%)    |
| Museo de Zoología Universidad del Azuay                   | 4 (6)           | 10 (56)           | 28 (169)          | 13 (43)          | 84 (262)          |                  | 1 (5)         | 140 (22%)   | 541 (1%)     |
| Museo de Zoología, Universidad Técnica Particular de Loja | 8 (16)          | 14 (71)           | 31 (496)          | 21 (320)         | 57 (956)          |                  |               | 131 (21%)   | 1859 (5%)    |
| Red List Assessment Workshop                              | 8 (25)          | 22 (58)           | 13 (40)           | 14 (29)          | 40 (145)          | 4 (9)            | 1 (1)         | 102 (16%)   | 307 (1%)     |
| Centro Jambatu                                            | 8 (16)          | 14 (20)           | 17 (21)           | 10 (51)          | 32 (65)           | ()               |               | 81 (13%)    | 173 (0%)     |
| Escuela Politécnica Nacional                              | 5 (17)          | 8 (12)            | 11 (29)           | 10 (19)          | 19 (65)           | 1 (1)            |               | 54 (8%)     | 143 (0%)     |
| Fundación Herpetológica Gustavo Orcés                     | 1 (1)           | 3 (3)             | 1 (1)             | 7 (16)           | 16 (64)           | 1 (1)            |               | 29 (5%)     | 86 (0%)      |
| Batrachia                                                 |                 | 3 (30)            | 4 (13)            | 1 (1)            | 2 (21)            |                  |               | 10 (2%)     | 65 (0%)      |
| Museo de Zoología Universidad Tecnológica Indoamérica     |                 |                   | 2 (2)             | 2 (2)            | 4 (4)             | 1 (1)            |               | 9 (1%)      | 9 (0.02%)    |
| Literature review                                         | 2 (2)           |                   |                   |                  |                   |                  |               | 2 (0.3%)    | 2 (0.01%)    |
| Proyecto PARG                                             | 2 (168)         |                   |                   |                  |                   |                  |               | 2 (0.3%)    | 168 (0.5%)   |
| <b>Total Species (records)</b>                            | <b>85 (636)</b> | <b>147 (2419)</b> | <b>131 (4294)</b> | <b>78 (4068)</b> | <b>26 (24939)</b> | <b>168 (376)</b> | <b>1 (11)</b> |             | <b>37328</b> |

957

958

959

960



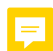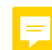

961 **Table 3.** Species (percentage) and categories of risk, assessed by a family in Ecuadorian  
 962 amphibians. CR = Critically Endangered, EN = Endangered, VU = Vulnerable, NT = Near  
 963 Threatened, LC = Least Concern, DD = Data Deficient. Pale red-shaded numbers are highlighted  
 964 for families with the highest number of species in each threatened category. Threatened  
 965 representativeness (TR): (number of threatened taxa / total number of taxa per family)\*100.

966

| Class/Families       | CR                | EN                 | VU                 | NT                | LC                 | DD               | Threatened Taxa    | Total Taxa        | TR (%)       |
|----------------------|-------------------|--------------------|--------------------|-------------------|--------------------|------------------|--------------------|-------------------|--------------|
| <b>Anura</b>         | <b>81 (13.5%)</b> | <b>136 (22.6%)</b> | <b>124 (20.6%)</b> | <b>78 (13%)</b>   | <b>162 (27%)</b>   | <b>20 (3.3%)</b> | <b>341 (56.7%)</b> | <b>601 (100%)</b> | <b>56.7%</b> |
| Aromobatidae         |                   |                    | 2 (0.3%)           |                   | 4 (0.7%)           | 1 (0.2%)         | 2 (0.3%)           | 7 (1.2%)          | 28.6%        |
| Bufo                 | 29 (4.8%)         | 7 (1.2%)           | 6 (1%)             |                   | 12 (2%)            | 2 (0.3%)         | 42 (7%)            | 56 (9.3%)         | 75%          |
| Centrolenidae        | 8 (1.3%)          | 22 (3.7%)          | 8 (1.3%)           | 7 (1.2%)          | 11 (1.8%)          | 4 (0.7%)         | 38 (6.3%)          | 60 (10%)          | 63.3%        |
| Ceratophryidae       |                   |                    | 1 (0.2%)           |                   | 1 (0.2%)           | 1 (0.2%)         | 1 (0.2%)           | 3 (0.5%)          | 33.3%        |
| Craugastoridae       |                   |                    |                    |                   | 1 (0.2%)           |                  |                    | 1 (0.2%)          | 0%           |
| Dendrobatidae        | 10 (1.7%)         | 12 (2%)            | 9 (1.5%)           | 9 (1.5%)          | 7 (1.2%)           |                  | 31 (5.2%)          | 47 (7.8%)         | 66%          |
| Eleutherodactylidae  |                   | 1 (0.2%)           |                    |                   | 1 (0.2%)           |                  | 1 (0.2%)           | 2 (0.3%)          | 50%          |
| Hemiphractidae       | 7 (1.2%)          | 8 (1.3%)           | 1 (0.2%)           | 7 (1.2%)          | 2 (0.3%)           |                  | 16 (2.7%)          | 25 (4.2%)         | 64%          |
| Hylidae              | 5 (0.8%)          | 14 (2.3%)          | 6 (1%)             | 18 (3%)           | 55 (9.2%)          | 2 (0.3%)         | 25 (4.2%)          | 100 (16.6%)       | 25%          |
| Leptodactylidae      | 1 (0.2%)          | 2 (0.3%)           | 2 (0.3%)           | 2 (0.3%)          | 18 (3%)            |                  | 5 (0.8%)           | 25 (4.2%)         | 20%          |
| Microhylidae         |                   | 3 (0.5%)           | 2 (0.3%)           | 1 (0.2%)          | 5 (0.8%)           | 1 (0.2%)         | 5 (0.8%)           | 12 (2%)           | 41.7%        |
| Pipidae              |                   |                    |                    |                   | 1 (0.2%)           |                  |                    | 1 (0.2%)          | 0%           |
| Ranidae              |                   |                    |                    | 1 (0.2%)          | 2 (0.3%)           |                  |                    | 3 (0.5%)          | 0%           |
| Strabomantidae       | 18 (3%)           | 67 (11.1%)         | 87 (14.5%)         | 33 (5.5%)         | 42 (7%)            | 9 (1.5%)         | 172 (28.6%)        | 256 (42.6%)       | 67.2%        |
| Telmatobiidae        | 3 (0.5%)          |                    |                    |                   |                    |                  | 3 (0.5%)           | 3 (0.5%)          | 100%         |
| <b>Caudata</b>       | <b>3 (27.3%)</b>  | <b>5 (45.5%)</b>   |                    |                   | <b>2 (18.2%)</b>   | <b>1 (9.1%)</b>  | <b>8 (72.7%)</b>   | <b>11 (100%)</b>  | <b>72.7%</b> |
| Plethodontidae       | 3 (27.3%)         | 5 (45.5%)          |                    |                   | 2 (18.2%)          | 1 (9.1%)         | 8 (72.7%)          | 11 (100%)         | 72.7%        |
| <b>Gymnophiona</b>   | <b>1 (4.3%)</b>   | <b>6 (26.1%)</b>   | <b>7 (30.4%)</b>   |                   | <b>4 (17.4%)</b>   | <b>5 (21.7%)</b> | <b>14 (60.9%)</b>  | <b>23 (100%)</b>  | <b>60.9%</b> |
| Caeciliidae          |                   | 5 (21.7%)          | 4 (17.4%)          |                   | 3 (13%)            | 4 (17.4%)        | 9 (39.1%)          | 16 (69.6%)        | 56.3%        |
| Rhinatrema           | 1 (4.3%)          | 1 (4.3%)           | 1 (4.3%)           |                   |                    |                  | 3 (13%)            | 3 (13%)           | 100%         |
| Siphonopidae         |                   |                    | 1 (4.3%)           |                   | 1 (4.3%)           |                  | 1 (4.3%)           | 2 (8.7%)          | 50%          |
| Typhlonectidae       |                   |                    | 1 (4.3%)           |                   |                    | 1                | 1 (4.3%)           | 2 (8.7%)          | 50%          |
| <b>Total general</b> | <b>85 (13.4%)</b> | <b>147 (23.1%)</b> | <b>131 (20.6%)</b> | <b>78 (12.3%)</b> | <b>168 (26.5%)</b> | <b>26 (4.1%)</b> | <b>363 (57.2%)</b> | <b>635 (100%)</b> | <b>57.2%</b> |

967

968

## 969 **Supplementary Tables**

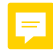

970 **S1 Table.** Institution Code, Institution name, database source, categories,  
971 number of records, and number of species assessed in the Red List for  
972 Ecuadorian amphibians.

973 **S2 Table.** Multi-Criteria Decision Making (MCDM) through the Analytic Hierarchy  
974 Process (AHP) for construct the threat model (Fig 4).

975 **S3 Table.** Species list of Ecuadorian amphibians, endemism, conservation areas,  
976 major threats, extinction risk criteria, subcriteria, and metrics used for the Red  
977 List Assessment.

978

979 **S4 Table.** The Red List for Ecuadorian amphibians, with details of criteria and  
980 subcriteria used for the evaluation of national categories. Categories: CR=  
981 Critically Endangered, EN=Endangered, VU= Vulnerable, NT= Near Threatened,  
982 LC= Least Concern, DD= Data Deficient, NE= Not Evaluated, correspond to  
983 *Rana catesbeiana*, an invasive species in Ecuador.

984

985 **S5 Table.** The number of taxa assessed by genera in the current evaluation,  
986 categories, and threatened representativeness in the group (%).

987

988 **S6 Table.** Species (percentage) and categories of threat assessed by type of  
989 protected area in Ecuador. CR= Critically Endangered, EN=Endangered, VU=  
990 Vulnerable, NT= Near Threatened, LC= Least Concern, DD= Data Deficient.  
991 SNAP= National System of Protected Areas, from the Spanish acronym.

992

993 **S7 Table.** Species (percentage) and categories of the conservation status of  
994 amphibians by major threats in Ecuador. CR= Critically Endangered,  
995 EN=Endangered, VU= Vulnerable, NT= Near Threatened, LC= Least Concern,  
996 DD= Data Deficient.

997

998 **S8 Table.** Species and categories of threat assessed by Natural Regions and  
999 Protected Area in Ecuadorian Amphibians. CR= Critically Endangered,  
1000 EN=Endangered, VU= Vulnerable, NT= Near Threatened, LC= Least Concern,  
1001 DD= Data Deficient.

1002

1003 **S9 Table.** Species (percentage) and categories of threat assessed by natural  
1004 regions and provinces in Ecuadorian Amphibians. CR= Critically Endangered,  
1005 EN=Endangered, VU= Vulnerable, NT= Near Threatened, LC= Least Concern,  
1006 DD= Data Deficient.

1007

1008 **Supplementary figures**

1009

1010 **S1 Fig.** Automated procedure was designed using the *ModelBuilder* tool in

1011 ArcMap v.10 to perform the iterative threat model and its analysis.

1012

1013 **S2 Fig** The threat model for Ecuadorian amphibians, raster image (.tiff).

1014

1015 <https://drive.google.com/file/d/1wkdx8DgDwKhVEyEIDhc23wmEiknFw4DE/view>

1016 [?usp=sharing](https://drive.google.com/file/d/1wkdx8DgDwKhVEyEIDhc23wmEiknFw4DE/view?usp=sharing)

1017

1018 **S3 Fig.** Cumulative richness models of taxa qualified as Critically endangered by

1019 family.

1020

1021 **S4 Fig** Cumulative richness models of taxa qualified as Endangered by family.

1022

1023 **S5 Fig** Cumulative richness models of taxa qualified as Vulnerable by family.

Figure 1

[Click here to access/download;Figure;Fig1.eps](#)

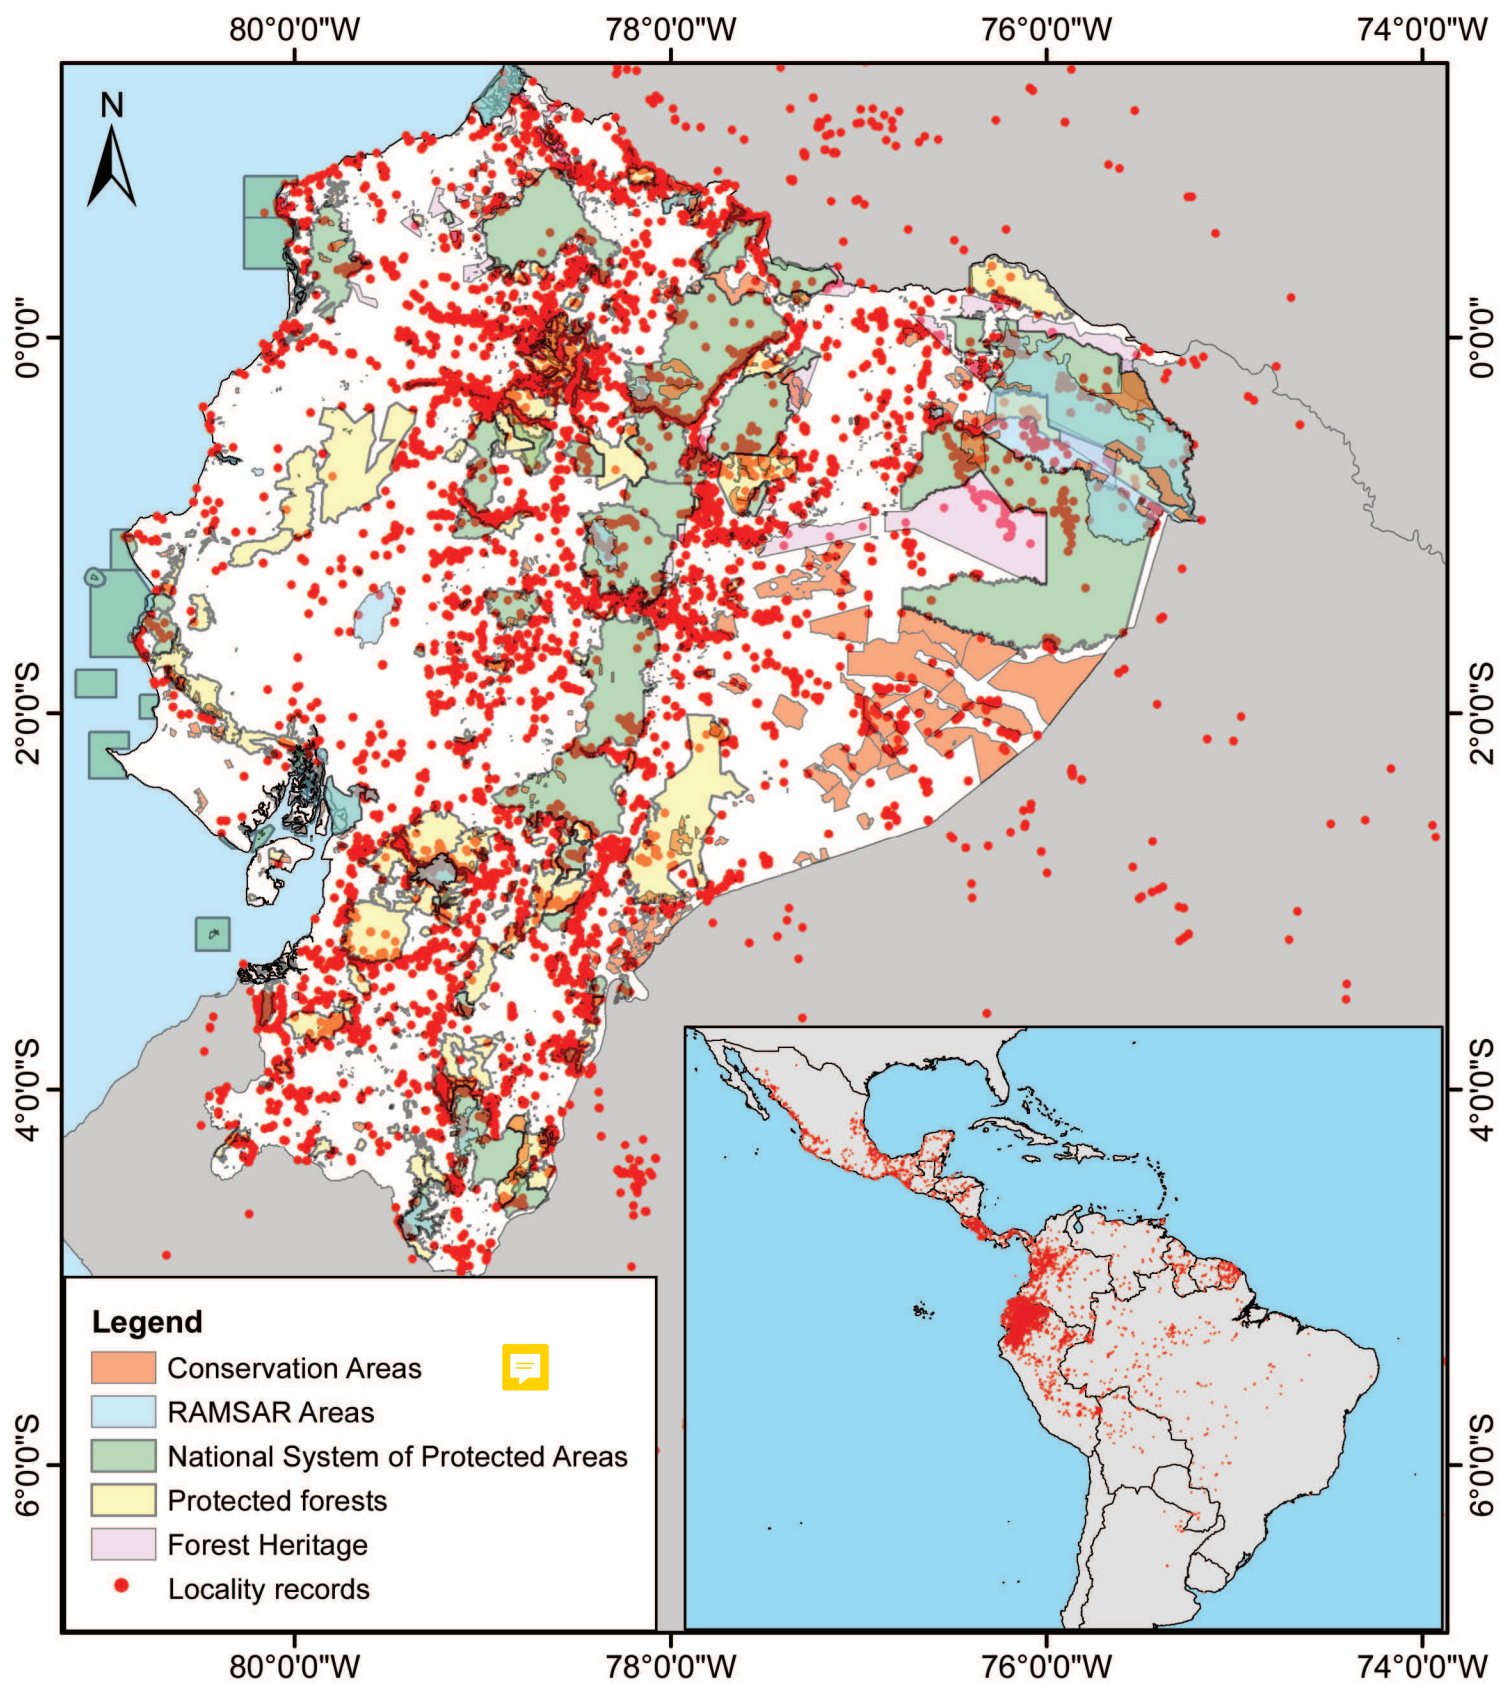

(a) IUCN Red List Categories

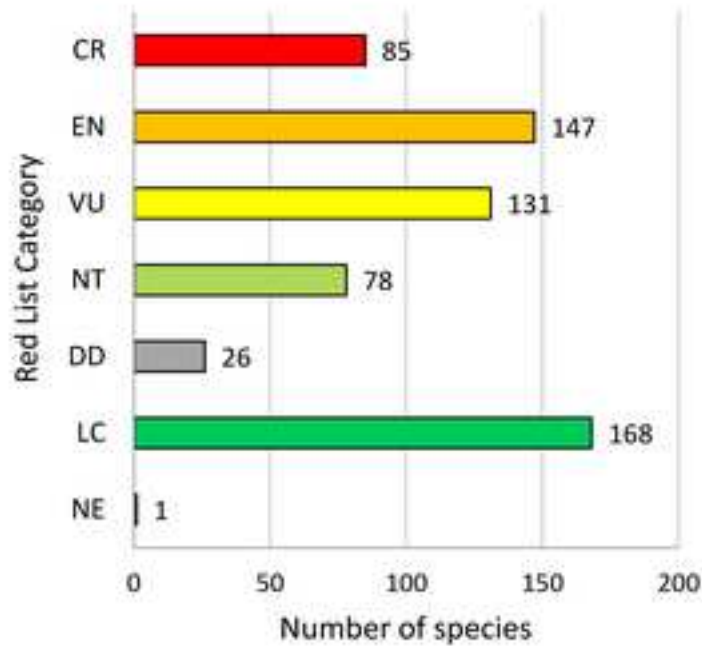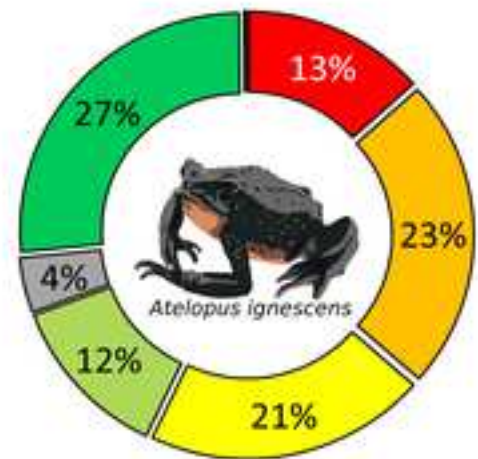

(b) Criteria

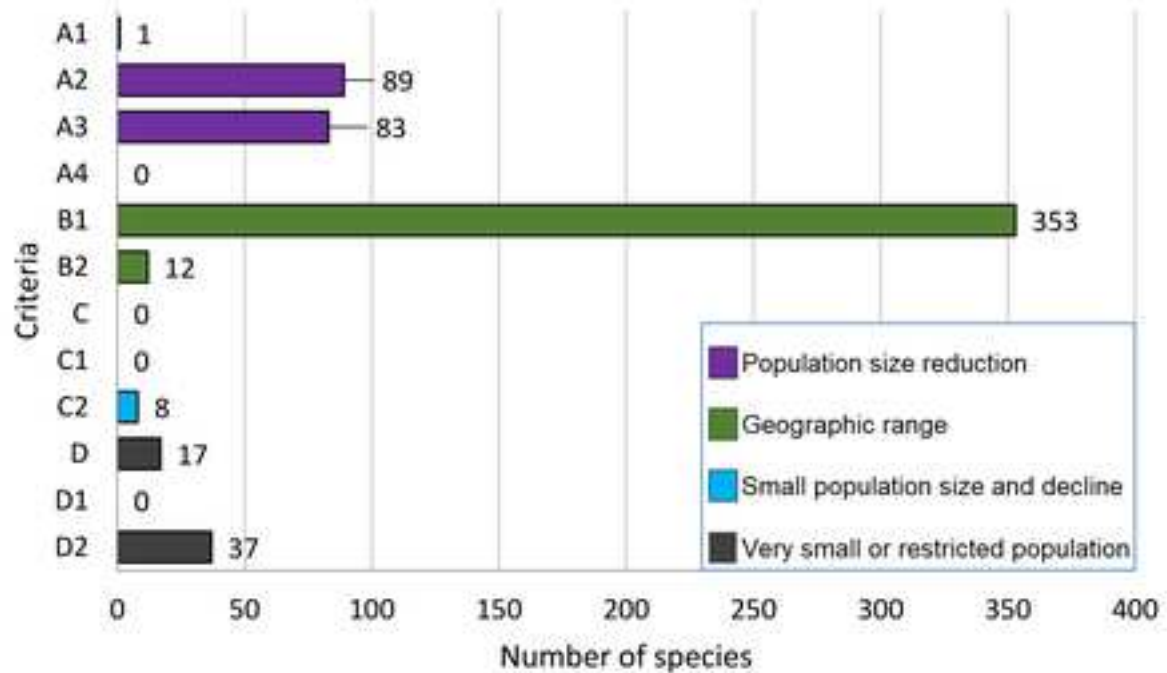



Figure 3

[Click here to access/download;Figure;Fig3.eps](#)

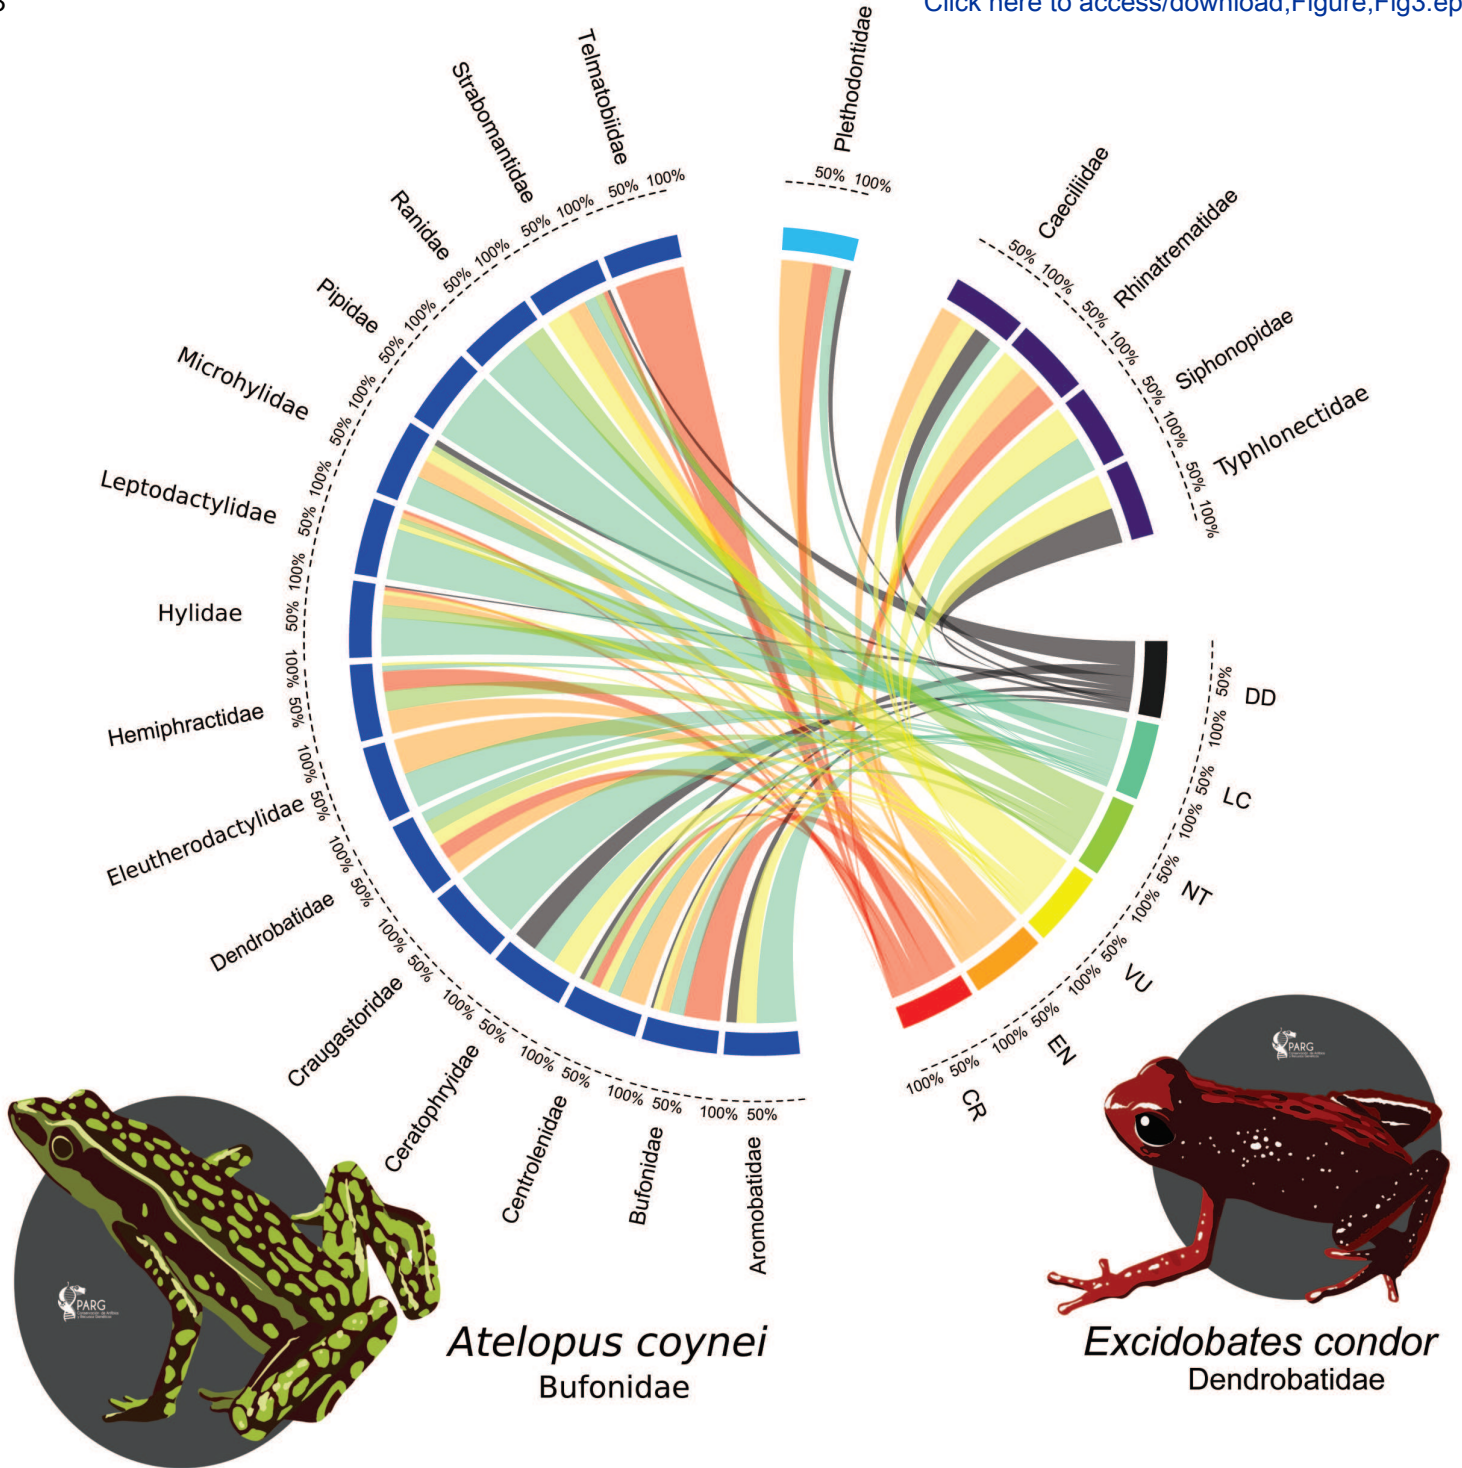

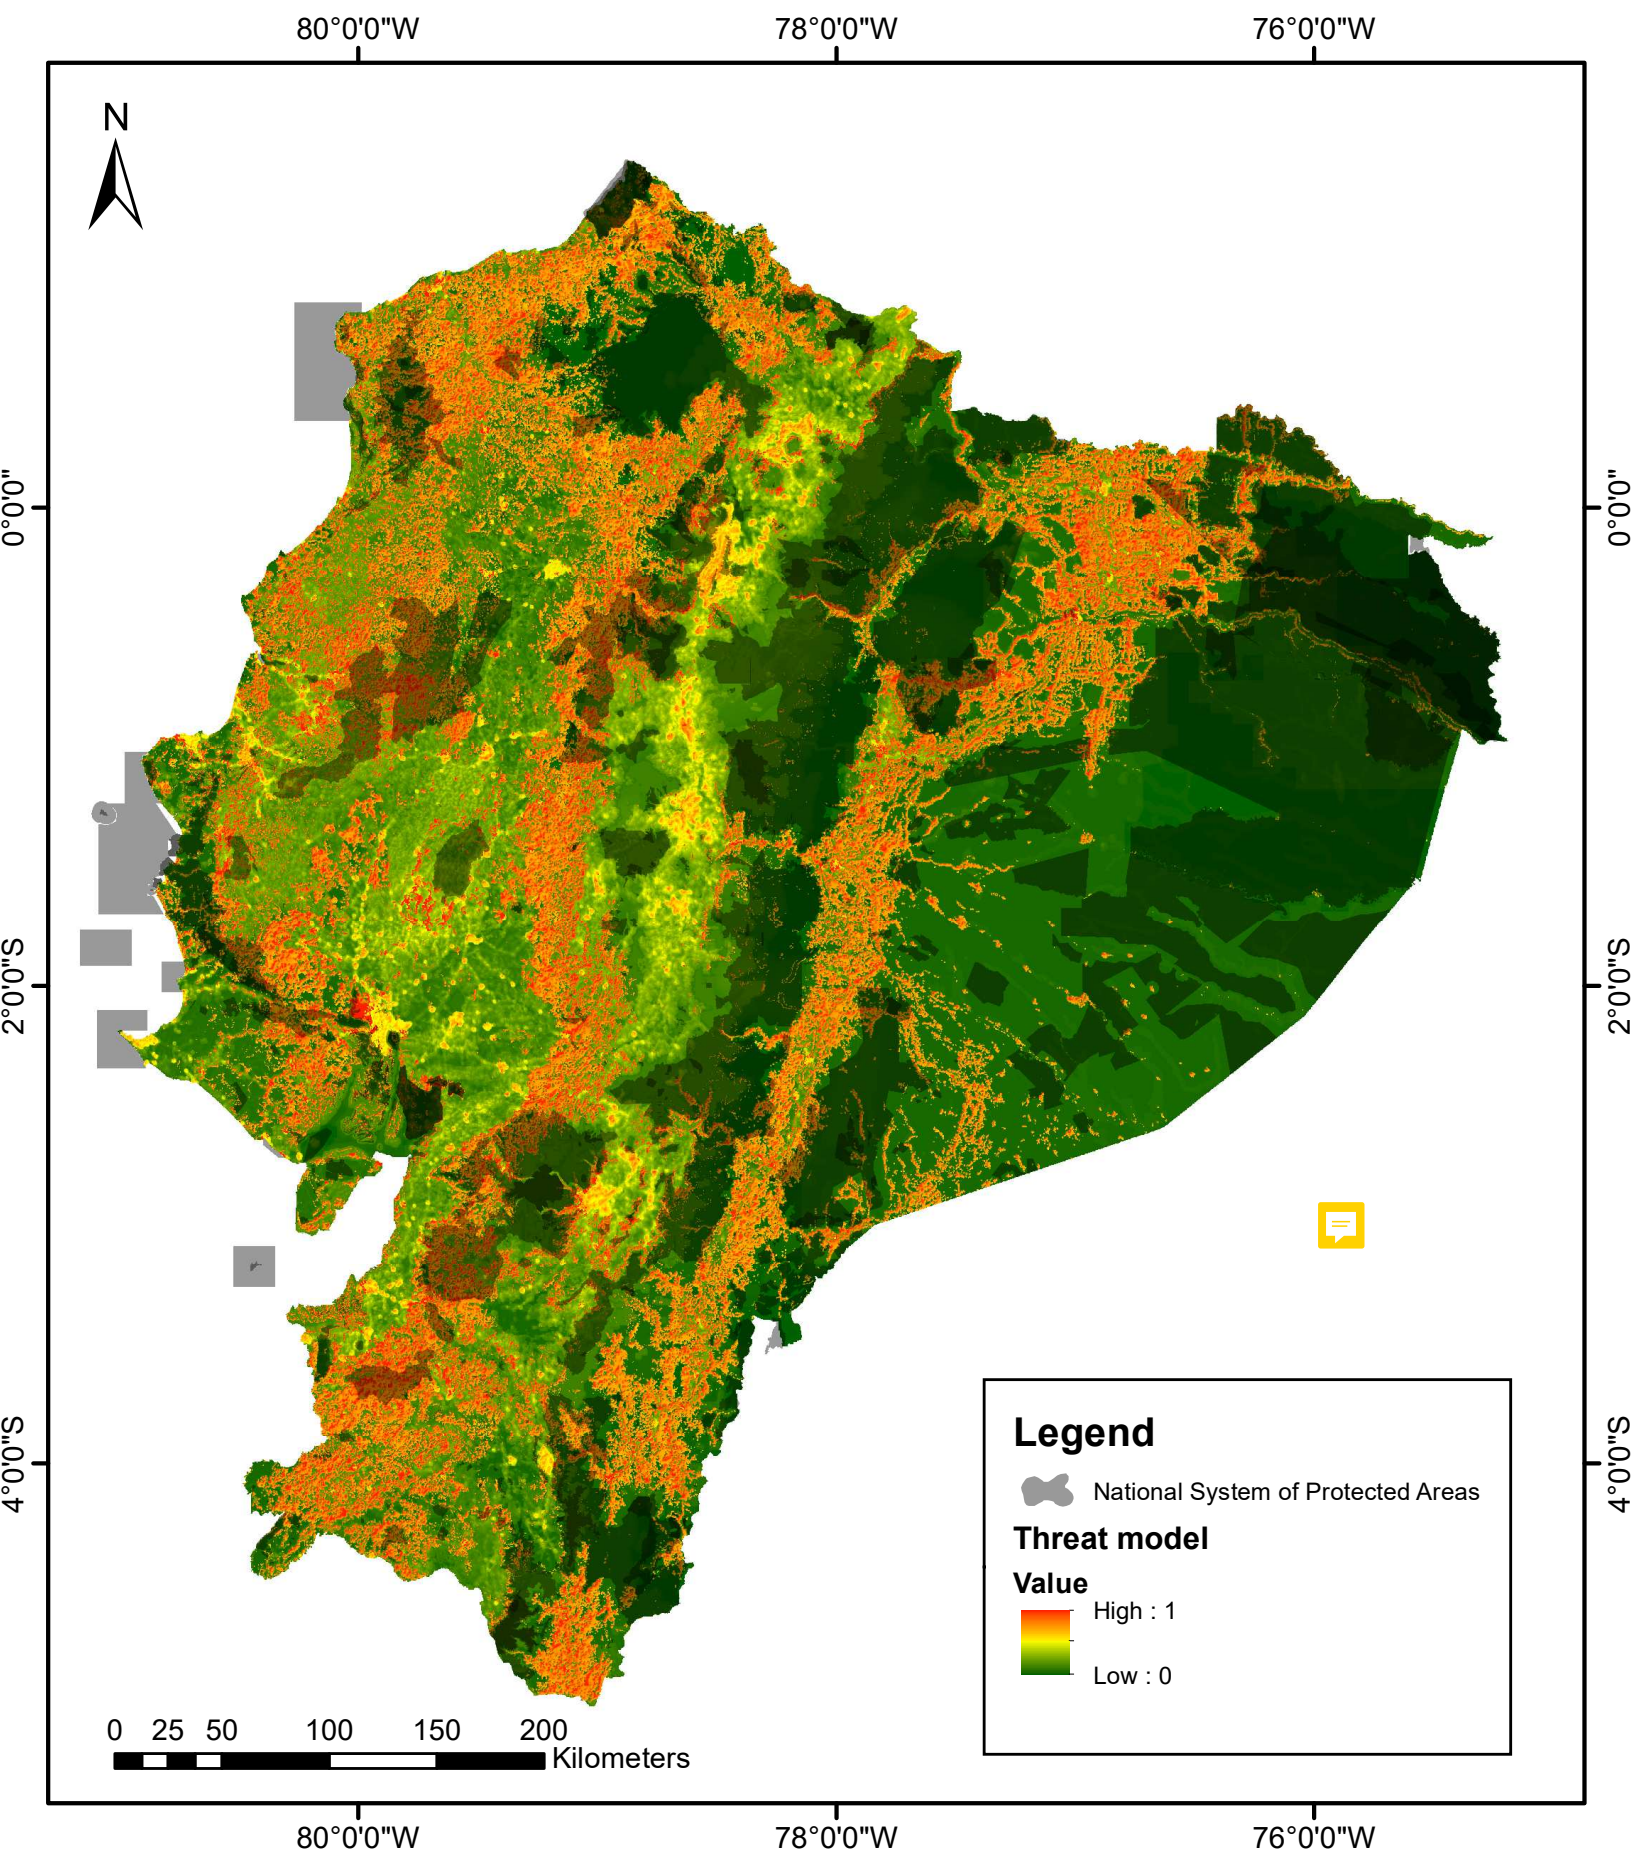



Figure 5

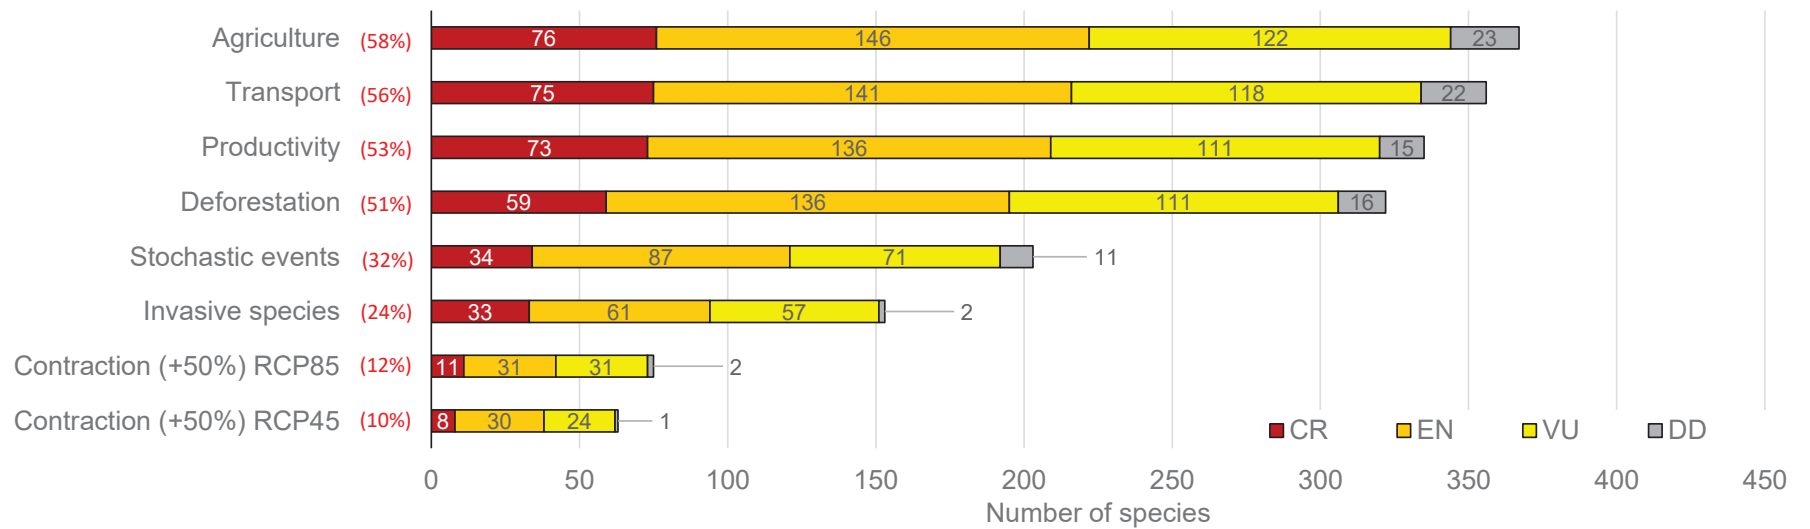

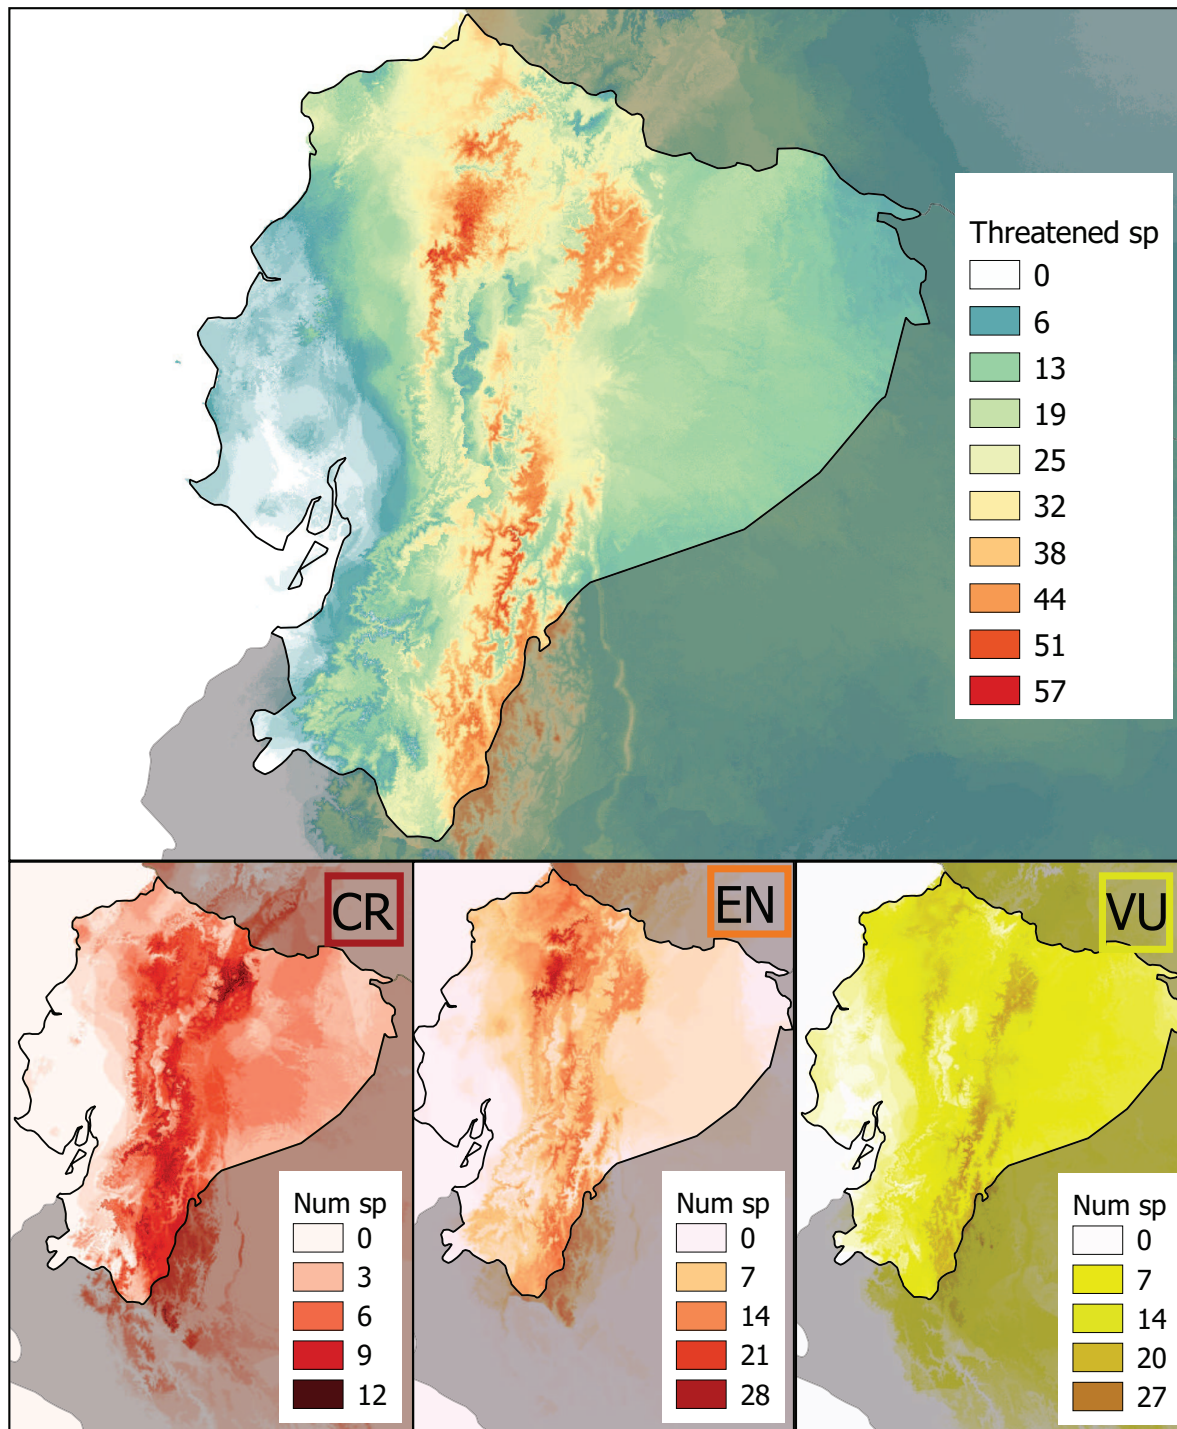

(a) Locality Records for threatened species

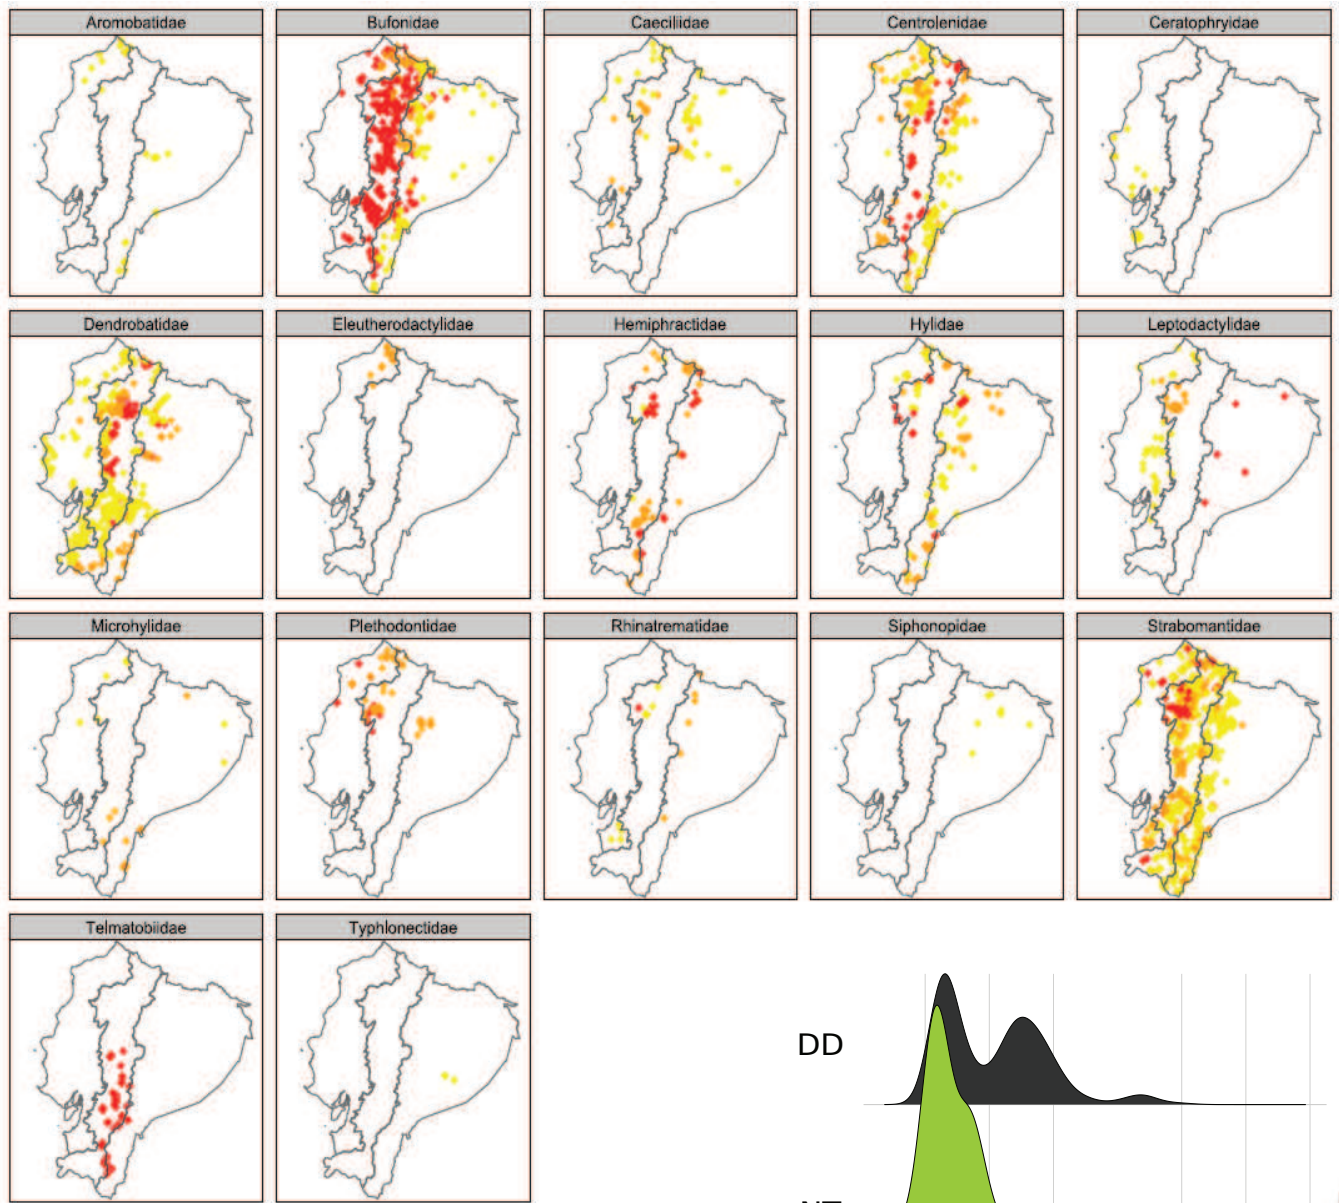

• CR • EN • VU

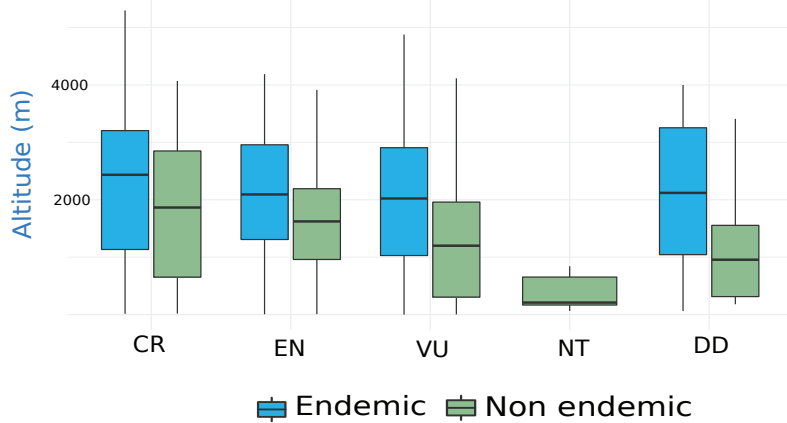

Endemic Non endemic

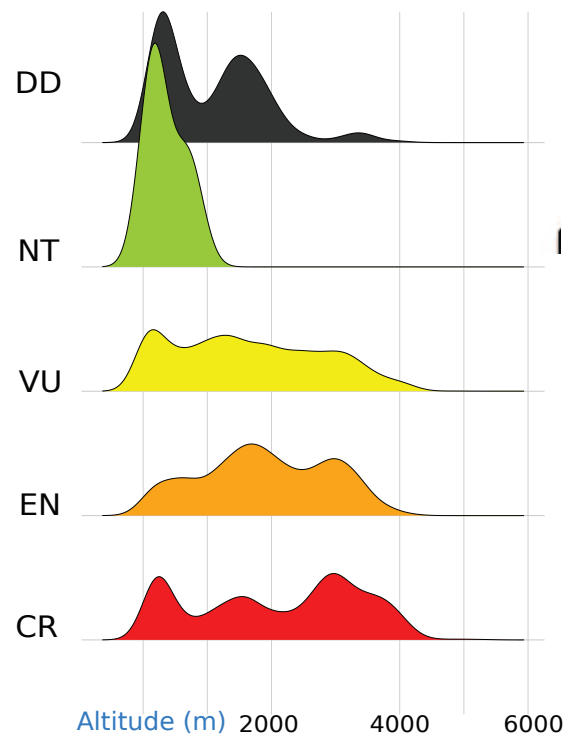

(b) Endemism

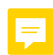

(c) Frequency of records



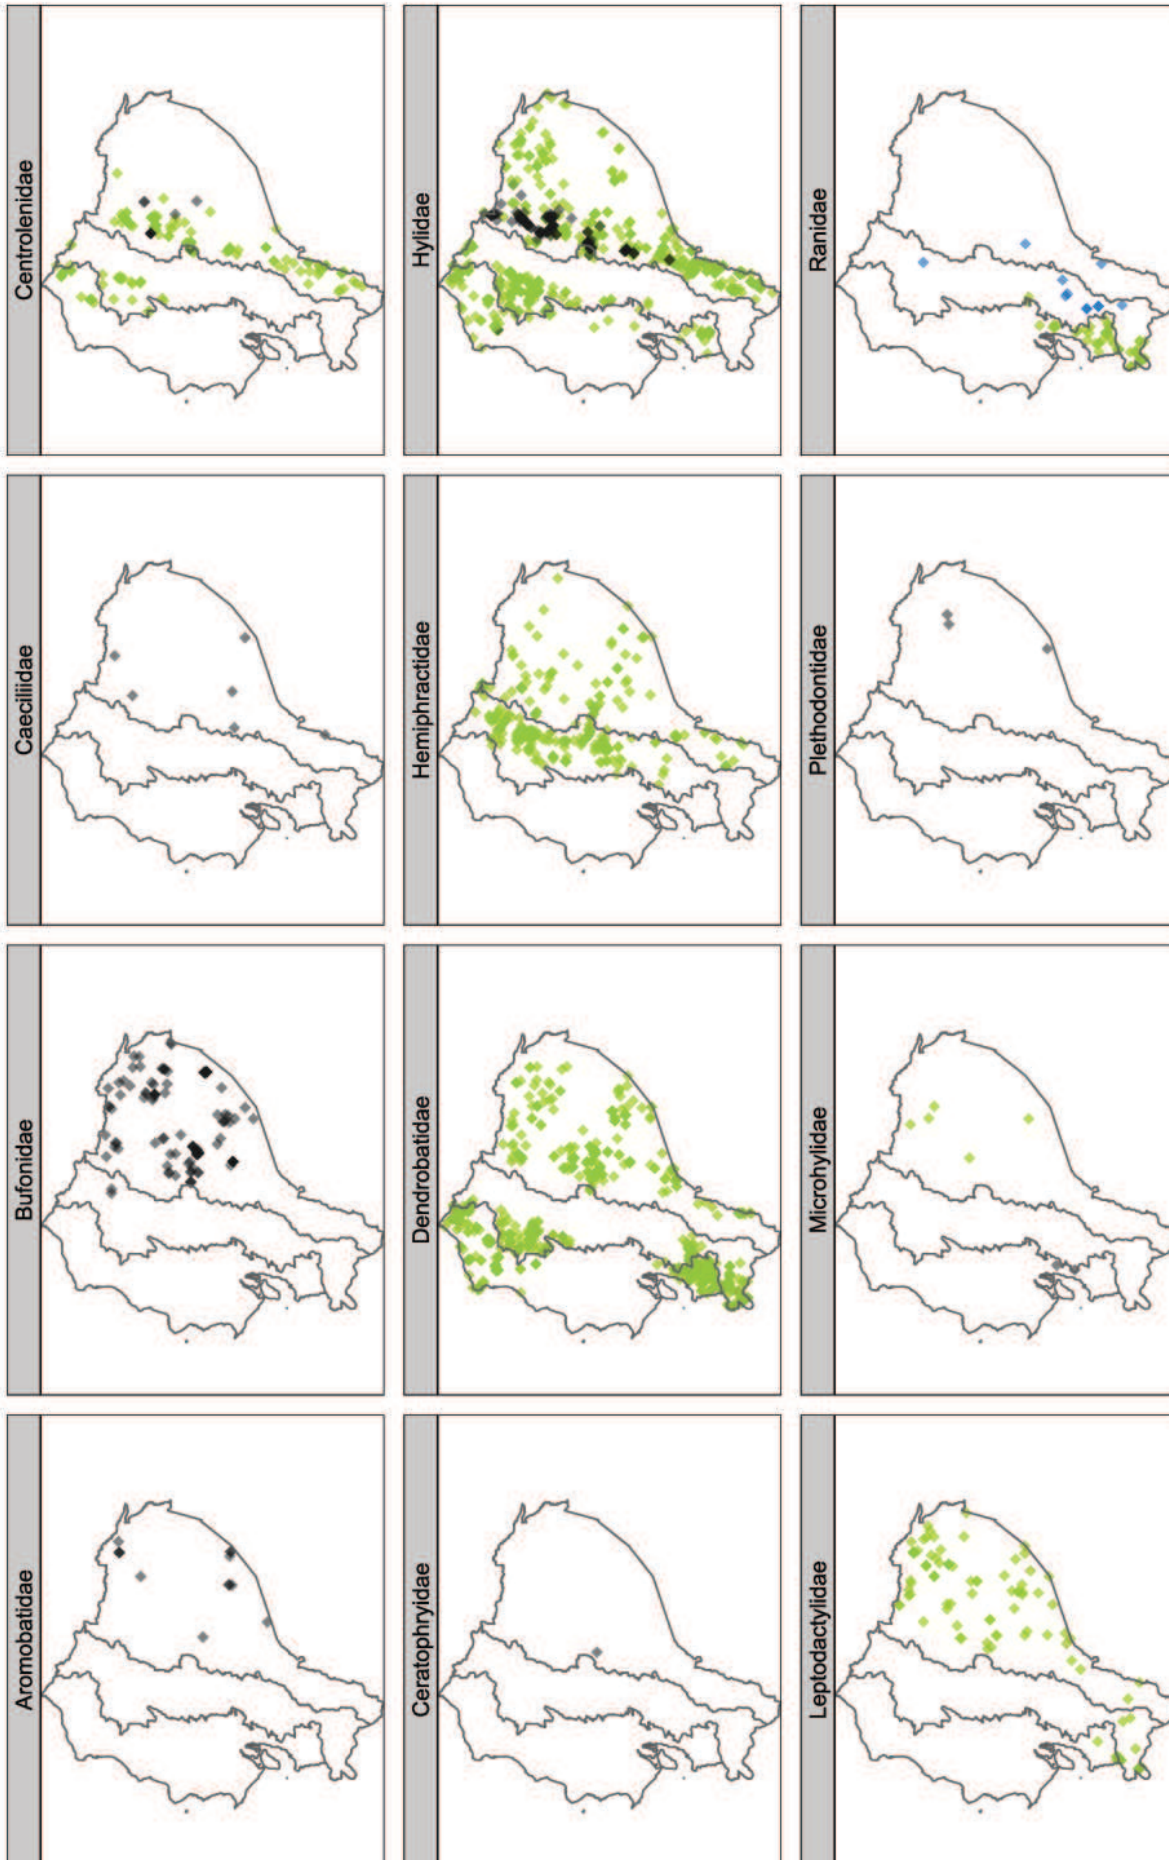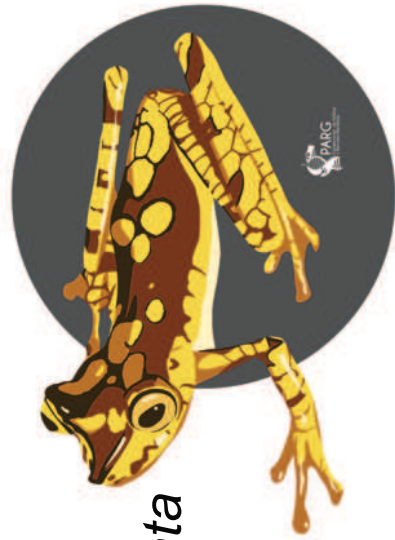

*Boana picturata*  
Hylidae

### Biogeographic Regions

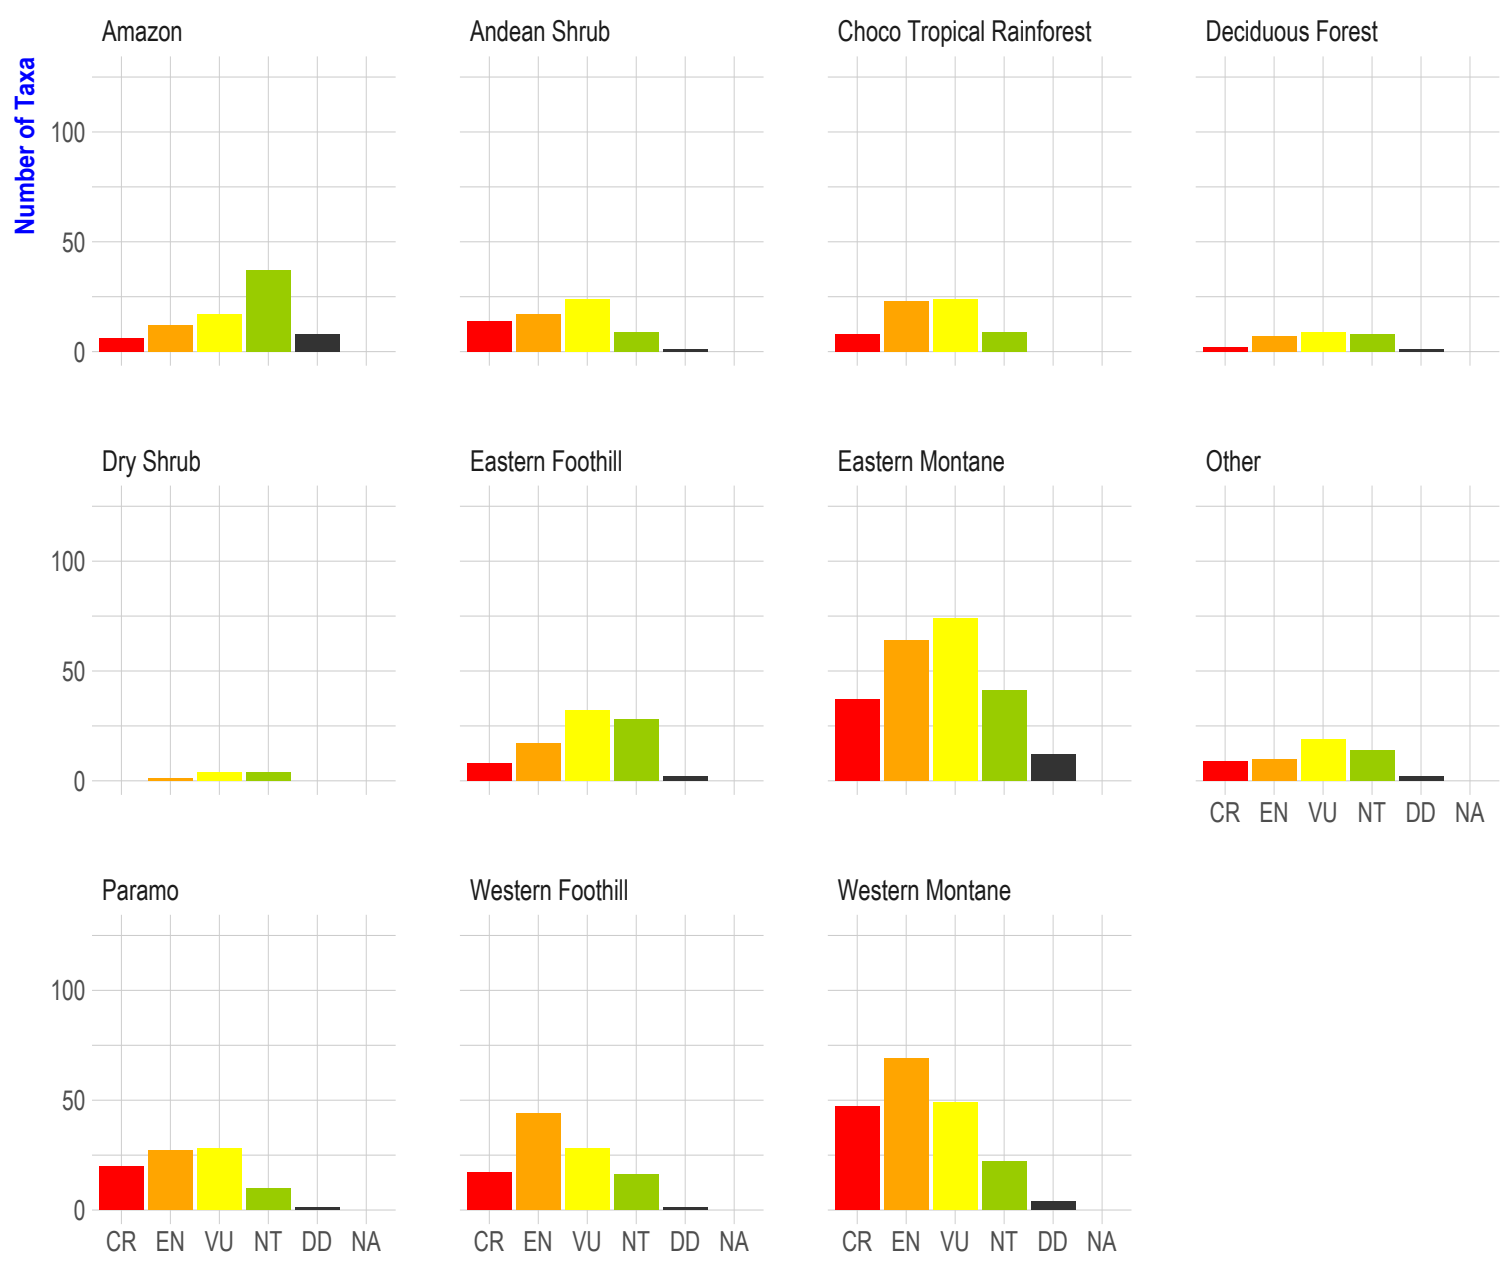

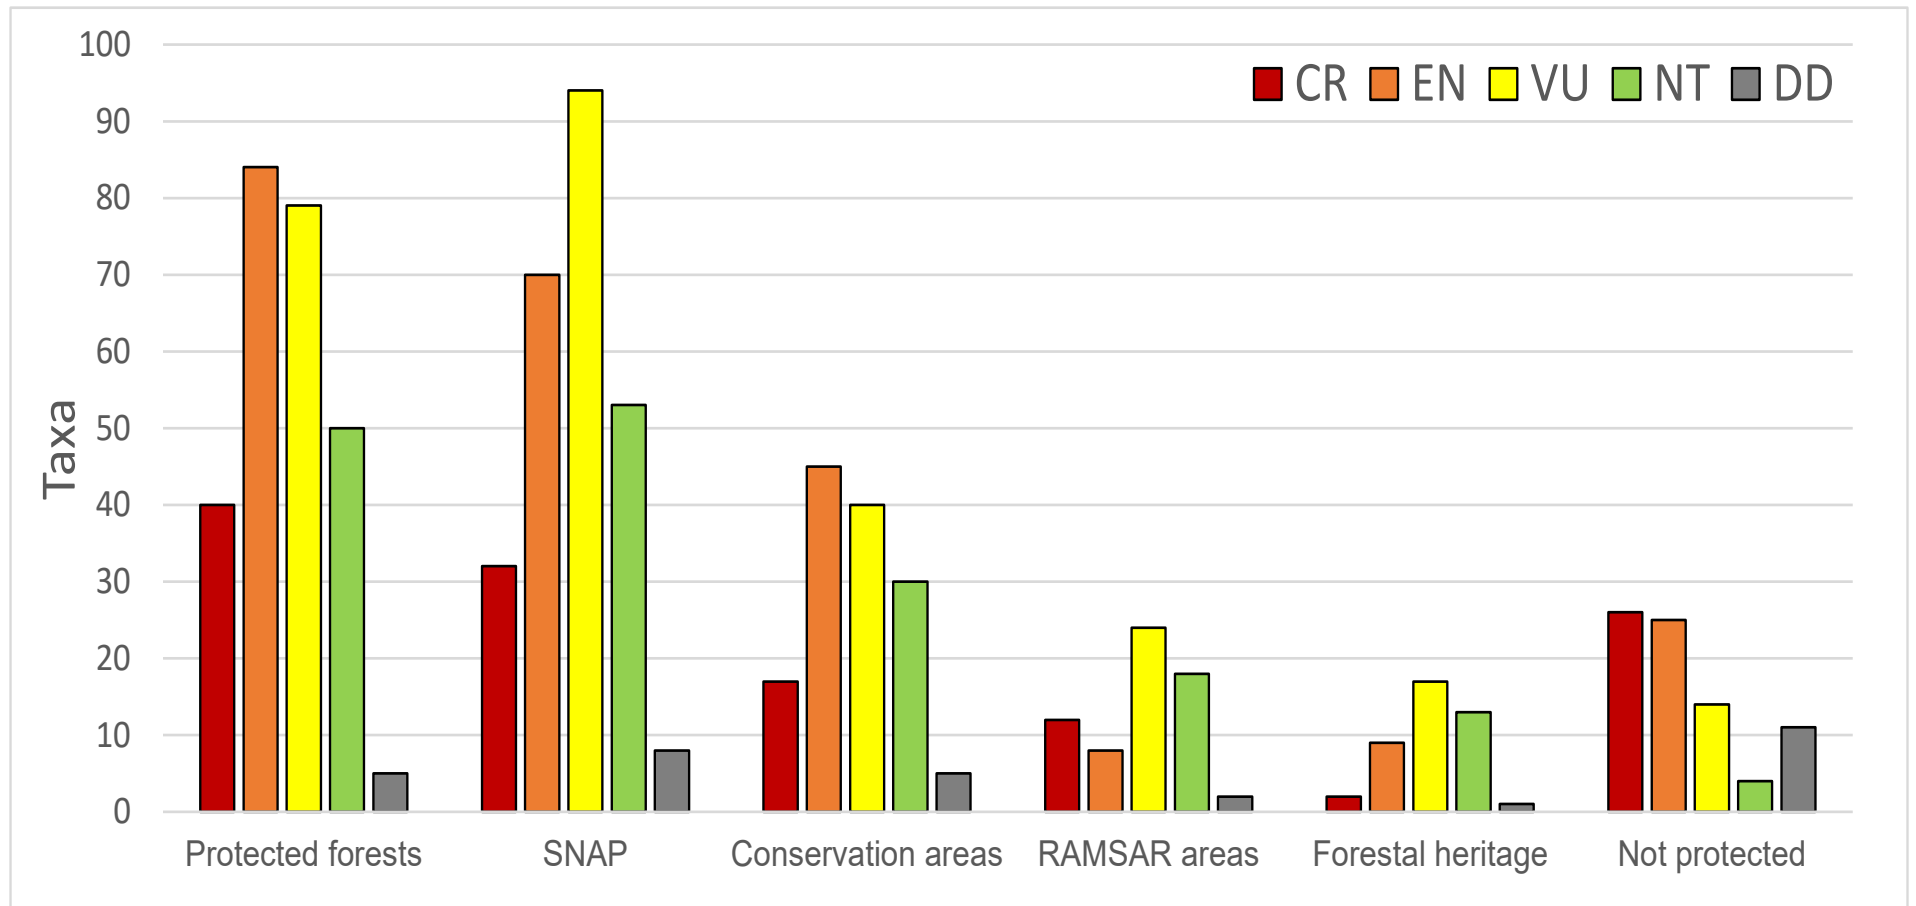

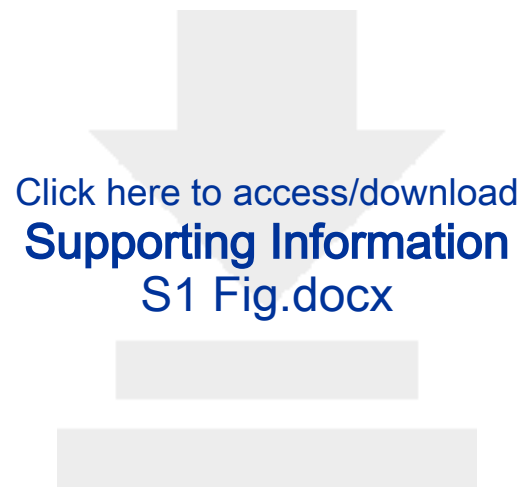

Click here to access/download  
**Supporting Information**  
S1 Fig.docx

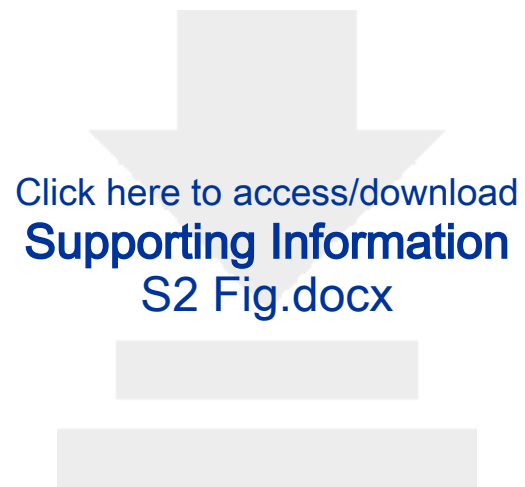

Click here to access/download  
**Supporting Information**  
S2 Fig.docx



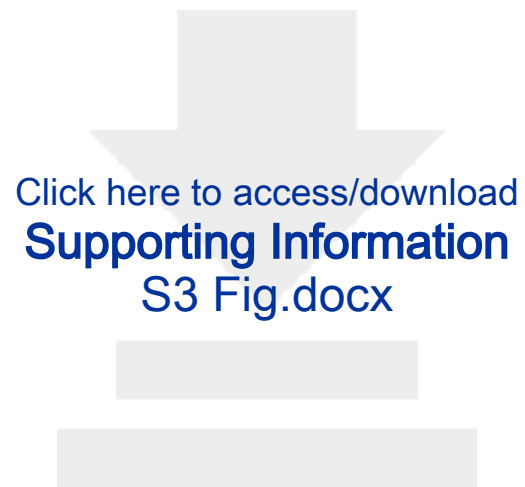

Click here to access/download  
**Supporting Information**  
S3 Fig.docx

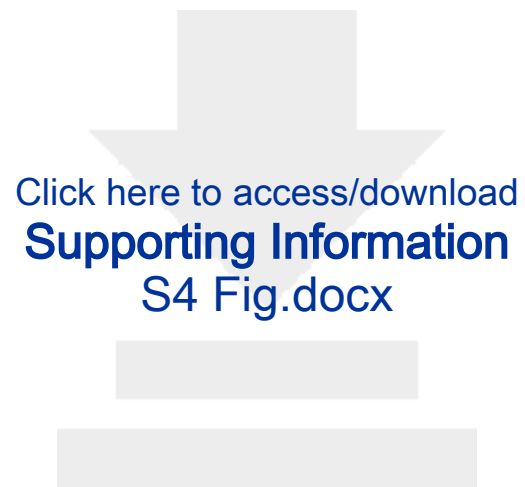

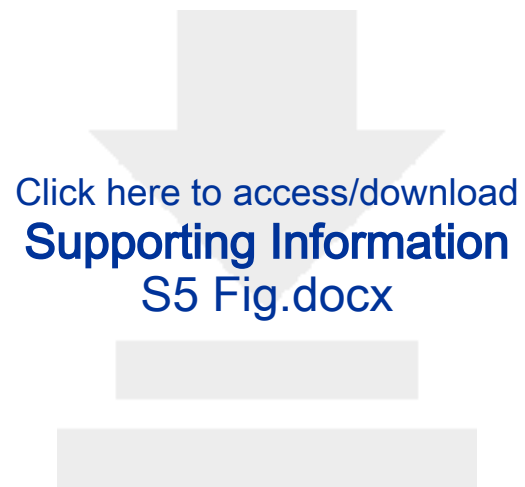

Click here to access/download  
**Supporting Information**  
S5 Fig.docx

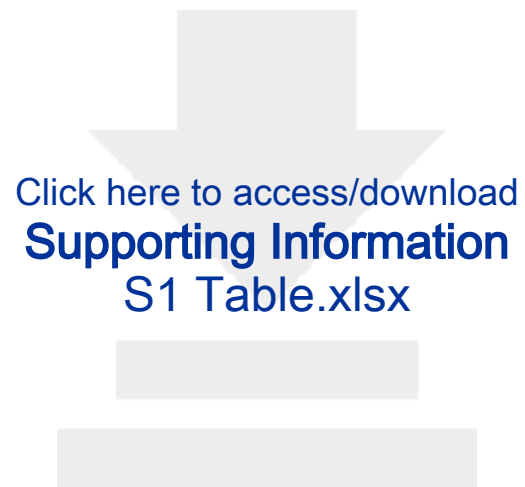

Click here to access/download  
**Supporting Information**  
S1 Table.xlsx

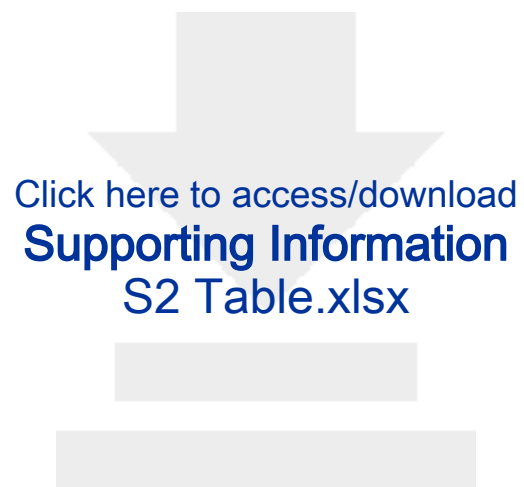

Click here to access/download  
**Supporting Information**  
S2 Table.xlsx

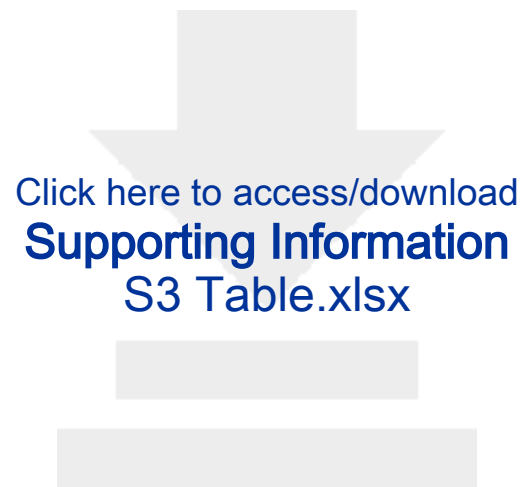

Click here to access/download  
**Supporting Information**  
S3 Table.xlsx

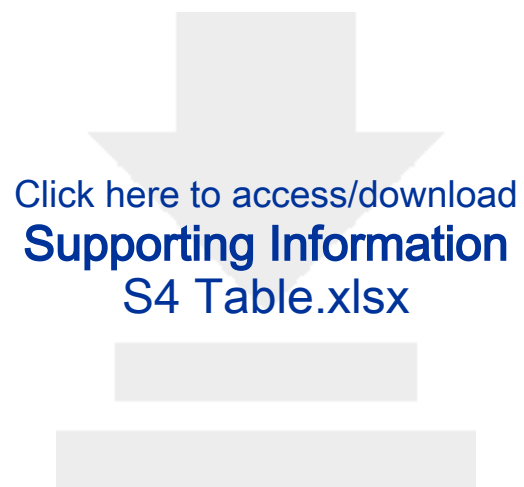

Click here to access/download  
**Supporting Information**  
S4 Table.xlsx

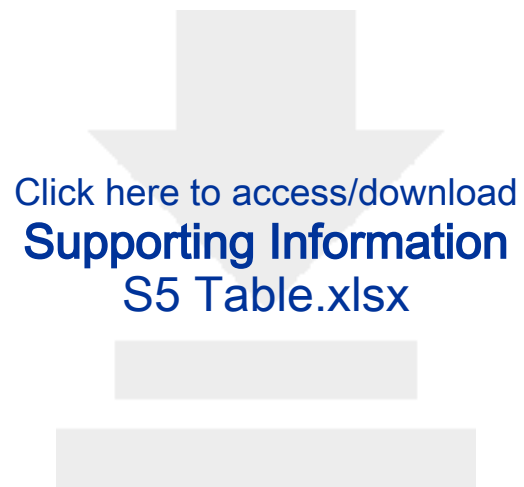

Click here to access/download  
**Supporting Information**  
S5 Table.xlsx



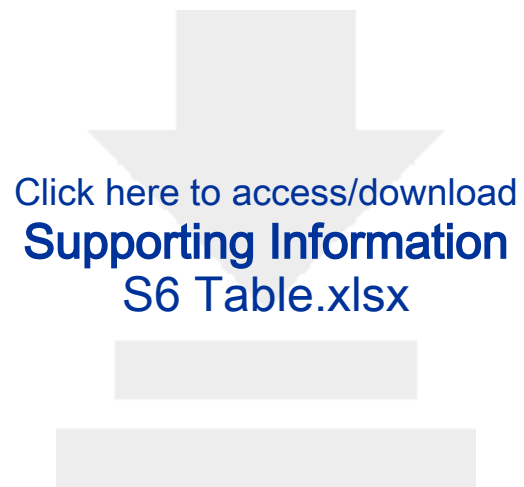

Click here to access/download  
**Supporting Information**  
S6 Table.xlsx

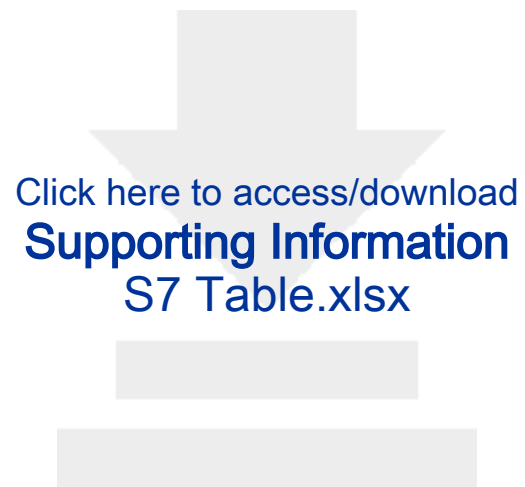

Click here to access/download  
**Supporting Information**  
S7 Table.xlsx

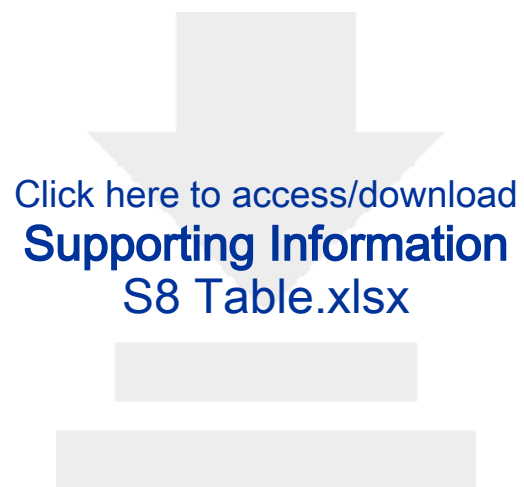

Click here to access/download  
**Supporting Information**  
S8 Table.xlsx

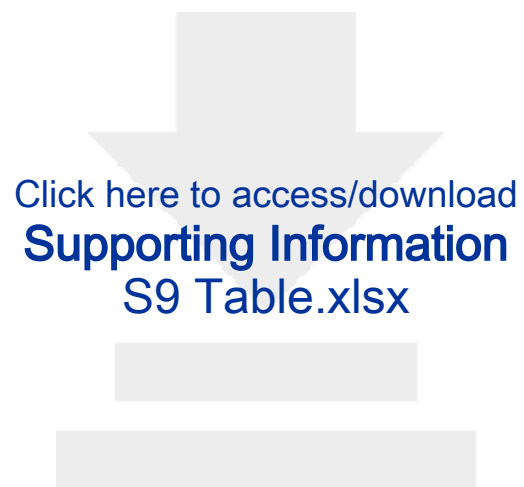

Click here to access/download  
**Supporting Information**  
S9 Table.xlsx
