# Supplementary material for: Red List assessment of amphibian species of Ecuador: A multidimensional approach for their conservation
Source: PLoS One. 2021 May 6;16(5):e0251027. doi: 10.1371/journal.pone.0251027 (PMC8101765; doi:10.1371/journal.pone.0251027)
Supplement: S6 Table — CR = Critically Endangered, EN = Endangered, VU = Vulnerable, NT = Near Threatened, LC = Least Concern, DD = Data Deficient. SNAP = National System of Protected Areas, from the Spanish acronym. (XLSX) [file pone.0251027.s006.xlsx]

## Sheet: S6_Table
S6_Table. Species (percentage) and categories of threat assessed by type of protection area in Ecuador. CR= Critically Endangered, EN=Endangered, VU= Vulnerable, NT= Near Threatened, LC= Least Concern, DD= Data Deficient. SNAP= National System of Protected Areas, from spanish acronym.
Protection category	CR	EN	VU	NT	DD	LC	Threatened taxa (%)	Overall taxa (%)
Protected forests	40 (6.3%)	84 (13.3%)	79 (12.5%)	50 (7.9%)	5 (0.8%)	138 (21.9%)	203 (32.2%)	396 (62.9%)
SNAP	32 (5.1%)	70 (11.1%)	94 (14.9%)	53 (8.4%)	8 (1.3%)	157 (24.9%)	196 (31.1%)	414 (65.7%)
Conservation areas	17 (2.7%)	45 (7.1%)	40 (6.3%)	30 (4.8%)	5 (0.8%)	121 (19.2%)	102 (16.2%)	258 (41%)
Not protected	26 (4.1%)	25 (4%)	14 (2.2%)	4 (0.6%)	11 (1.7%)	2 (0.3%)	65 (10.3%)	82 (13%)
RAMSAR areas	12 (1.9%)	8 (1.3%)	24 (3.8%)	18 (2.9%)	2 (0.3%)	114 (18.1%)	44 (7%)	178 (28.3%)
Forestal heritage	2 (0.3%)	9 (1.4%)	17 (2.7%)	13 (2.1%)	1 (0.2%)	111 (17.6%)	28 (4.4%)	153 (24.3%)
