# Supplementary material for: Red List assessment of amphibian species of Ecuador: A multidimensional approach for their conservation
Source: PLoS One. 2021 May 6;16(5):e0251027. doi: 10.1371/journal.pone.0251027 (PMC8101765; doi:10.1371/journal.pone.0251027)
Supplement: S7 Table — CR = Critically Endangered, EN = Endangered, VU = Vulnerable, NT = Near Threatened, LC = Least Concern, DD = Data Deficient. (XLSX) [file pone.0251027.s007.xlsx]

## Sheet: S7_Table
Category	Agriculture	Deforestation	Chytrid fungus	Productivity	Stochastic Events	Transport	Taxa (%)
CR	80 (92%)	62 (71.3%)	33 (37.9%)	76 (87.4%)	36 (41.4%)	78 (89.7%)	87 (13.8%)
EN	144 (98%)	135 (91.8%)	59 (40.1%)	135 (91.8%)	87 (59.2%)	139 (94.6%)	147 (23.3%)
VU	124 (94.7%)	112 (85.5%)	59 (45%)	112 (85.5%)	71 (54.2%)	120 (91.6%)	131 (20.8%)
NT	71 (97.3%)	68 (93.2%)	21 (28.8%)	68 (93.2%)	59 (80.8%)	69 (94.5%)	73 (11.6%)
LC	168 (100%)	168 (100%)	21 (12.5%)	168 (100%)	167 (99.4%)	167 (99.4%)	168 (26.7%)
DD	22 (3.5%)	15 (2.4%)	2 (0.3%)	15 (2.4%)	11 (1.7%)	22 (3.5%)	24 (3.8%)
Taxa (%)	610 (96.8%)	561 (89%)	196 (31.1%)	575 (91.3%)	432 (68.6%)	596 (94.6%)	630 (100%)
Records (%)	24951 (66.9%)	2871 (7.7%)	12096 (32.4%)	20655 (55.4%)	9949 (26.7%)	17286 (46.3%)	37299 (100%)
